# 1 **AI regulation in healthcare around the world: what is the status quo?**

2 Felix Busch<sup>1</sup>, MD, Raym Geis<sup>2</sup>, MD, Yuan-Cheng Wang<sup>3</sup>, MD PhD, Jakob Nikolas Kather<sup>4,5</sup>, MD, MSc,  
3 Noor Al Khorfi<sup>6</sup>, MD, Marcus R Makowski<sup>1</sup>, MD PhD, Israel K Kolawole<sup>7</sup>, FWACS, Daniel Truhn<sup>8</sup>, MD,  
4 MSc, Warren Clements<sup>9,10,11</sup>, MBBS, MHA, Stephen Gilbert<sup>12</sup>, PhD, Lisa C Adams<sup>1</sup>, MD, Esteban Ortiz-  
5 Prado<sup>13†</sup>, MD PhD, Keno K Bressemer, MD<sup>1,14†</sup>

6 <sup>1</sup> School of Medicine and Health, Department of Diagnostic and Interventional Radiology, Klinikum rechts  
7 der Isar, TUM University Hospital, Technical University of Munich, Munich, Germany

8 <sup>2</sup> Department of Radiology, National Jewish Health, Denver, Colorado, USA

9 <sup>3</sup> Department of Radiology, Zhongda Hospital, Nurturing Center of Jiangsu Province for State Laboratory of AI  
10 Imaging & Interventional Radiology, School of Medicine, Southeast University, Nanjing, China

11 <sup>4</sup> Else Kroener Fresenius Center for Digital Health, Medical Faculty Carl Gustav Carus, TUD Dresden,  
12 Dresden, Germany

13 <sup>5</sup> Medical Oncology, National Center for Tumor Diseases (NCT), University Hospital Heidelberg,  
14 Heidelberg, Germany

15 <sup>6</sup> Department of Diagnostic Imaging, Sidra Medicine, Doha, Qatar

16 <sup>7</sup> Department of Anesthesia, University of Ilorin/Teaching Hospital, Ilorin, Nigeria

17 <sup>8</sup> Department of Diagnostic and Interventional Radiology, University Hospital RWTH Aachen, Aachen, Germany

18 <sup>9</sup> Department of Radiology, Alfred Health, Melbourne, Victoria, Australia

19 <sup>10</sup> Department of Surgery, Monash University School of Translational Medicine, Melbourne, Victoria  
20 Australia

21 <sup>11</sup> National Trauma Research Institute, Melbourne, Victoria, Australia

22 <sup>12</sup> Else Kroener Fresenius Center for Digital Health, TUD Dresden University of Technology, Dresden,  
23 Germany

24 <sup>13</sup> Universidad de Las Américas, Quito, Ecuador

25 <sup>14</sup> School of Medicine and Health, Institute for Cardiovascular Radiology and Nuclear Medicine, German Heart  
26 Center Munich, TUM University Hospital, Technical University of Munich, Munich, Germany

27 † Contributed equally

28 Correspondence: Felix Busch, MD; Mail: [felix.busch@tum.de](mailto:felix.busch@tum.de); Address: Klinikum rechts der Isar, TUM  
29 University Hospital, Ismaninger Str. 22, 81675 Munich, Germany; Telephone: +49 (0) 89 4140 1180

**NOTE: This preprint reports new research that has not been certified by peer review and should not be used to guide clinical practice.**

## 30 **Summary**

31 The rapid adoption of artificial intelligence (AI) raises challenges related to ethics, safety, equity, and governance  
32 that require robust regulatory frameworks. In most jurisdictions, AI-driven medical devices are already covered  
33 by existing medical device frameworks, although new AI-specific legislation may be required to address the  
34 challenges posed by recent advancements. This expert review focuses on frameworks and legislation explicitly  
35 tailored to AI, synthesizing research literature, government and intergovernmental framework programs, and  
36 online media coverage to provide an up-to-date assessment of global AI-specific regulation or strategies in  
37 healthcare as of December 2024. Our findings show that only 15.2% (n=30/197) of countries or territories have  
38 enacted legally binding AI-specific legislation, including the 27 member states of the European Union (EU)  
39 following the adoption of the EU AI Act. A further 9.1% (n=18/197) have drafted legislation, and 28.4%  
40 (n=56/197) have issued non-binding guidelines. Notably, 47.2% (n=93/197) of countries or territories do not have  
41 an AI-specific framework or legislation in place. Furthermore, our results highlight disparities between the Global  
42 North and South, with 60.3% (n=82/136) of Global South countries or territories lacking frameworks or  
43 legislation, compared to 18% (n=11/61) in the Global North. In conclusion, our work provides an overview of the  
44 status quo of AI regulation around the world, highlights disparities in the adoption of frameworks and legislation,  
45 and calls for the need for intergovernmental and regional cooperation.

## 46 **Funding**

47 European Union

## 48 Introduction

49 Artificial intelligence (AI) is increasingly being integrated into various industries worldwide, including healthcare,  
50 with a recent analysis estimating that AI could contribute up to \$15.7 trillion to the global economy by 2030,  
51 driving gross domestic product increases of up to 26% in China or 14.5% in North America.<sup>1</sup> In healthcare, AI  
52 promises to improve diagnostic accuracy, treatment planning, and resource management. However, global  
53 organizations such as the World Health Organization emphasize the urgent need for safeguards to ensure data  
54 security, protect patients, and promote equitable access.<sup>2,3</sup> Although 67 countries have introduced national AI  
55 strategies between 2017 and 2023, many still rely on existing data privacy or medical device frameworks rather  
56 than AI-specific legally binding legislation, potentially resulting in a patchwork of oversight that could ultimately  
57 put patients at risk.<sup>4</sup>

58 Meanwhile, several intergovernmental initiatives have issued AI-specific guidelines. In March 2024, the United  
59 Nations (UN) General Assembly adopted its first resolution on AI, promoting 'safe, secure, and trustworthy' AI  
60 systems and urging nations to protect human rights and monitor potential risks.<sup>5</sup> In September 2024, the newly  
61 created UN High-level Advisory Body on AI released its *Governing AI for Humanity* report, which suggested that  
62 while no new global AI agency is currently on the agenda, stronger international coordination might be necessary.<sup>6</sup>  
63 Other intergovernmental organizations like the Organization for Economic Cooperation and Development  
64 (OECD) published various reports on AI risks, benefits, and policy imperatives and convened an Expert Group  
65 on AI Futures to address emerging challenges.<sup>7-9</sup> In addition, the *G7 Hiroshima Process on Generative AI* and the  
66 *G20 AI Principles* advanced voluntary principles for AI oversight, emphasizing transparency, accountability, and  
67 data privacy.<sup>10,11</sup> However, these frameworks remain non-binding, offering only voluntary guidelines for the safe  
68 and ethical adoption of AI.

69 In contrast, the European Union (EU) enacted the first supranational legally binding framework for AI in March  
70 2024 with the adoption of the AI Act, which applies to all 27 member states.<sup>12</sup> In addition, in September 2024, the  
71 Council of Europe opened for signature the *Framework Convention on AI and Human Rights, Democracy, and*  
72 *the Rule of Law*, the first internationally binding treaty that requires signatories to integrate safeguards throughout  
73 the entire AI lifecycle.<sup>13</sup>

74 In this rapidly evolving landscape, the present expert review synthesizes research literature, government and  
75 intergovernmental framework programs, and online media coverage to provide an up-to-date assessment of global  
76 AI-specific regulation and strategies in healthcare as of December 2024. In general, in most jurisdictions with  
77 established regulatory structures, medical devices, including those that integrate AI, are already subject to existing

78 medical device frameworks. Thus, the absence of dedicated legislation does not necessarily mean AI-powered  
79 systems are unregulated. In contrast, this review centers on emerging frameworks and legislation explicitly  
80 tailored to AI with the aim to identify regional disparities and offer insights into current national AI-specific  
81 frameworks and legislation, guiding researchers, policymakers, and other stakeholders through the complexities  
82 of AI-driven healthcare governance. The subsequent sections are organized by regions or countries, depending on  
83 the specific AI frameworks or legislative measures implemented at the regional or national level.

84

## 85 **Search strategy and selection criteria**

86 References for this review were identified through searches on PubMed and Google Scholar across all 197  
87 countries and territories, using the name of each country or territory as the primary search term, followed by  
88 "artificial intelligence" combined with "strategy," "legislation," "regulation," "law," or "framework," without time  
89 restrictions as of December 2024. Articles were also identified through searches of the authors' own files. In  
90 addition, the authors have reviewed government and intergovernmental framework programs, as well as media  
91 reports, to determine the regulatory status of each country or territory. The final reference list has been compiled  
92 on the basis of originality and relevance to the broad scope of this review and, in most cases, refers directly to the  
93 English version of the relevant frameworks or legislation.

## 94 **European Union**

95 The EU adopted the AI Act in March 2024, a horizontal regulatory framework for AI applying to various sectors,  
96 including healthcare, which has been binding law in all 27 member states since August 2024.<sup>12</sup> The AI Act aims  
97 to protect health, safety, and fundamental rights while promoting trustworthy AI across industries and categorizes  
98 AI systems into different risk levels, each with specific regulatory requirements.<sup>14</sup> Prohibited AI practices, such  
99 as manipulative or exploitative AI and facial recognition, are banned unless used in lawful medical contexts like  
100 psychological treatments. High-risk AI systems, including medical devices under the EU *Medical Device*  
101 *Regulation* (MDR), must now meet new standards regarding fairness, bias control, equity, transparency, and  
102 training data.<sup>15</sup> General-purpose AI models, like large language models, face additional obligations if they present  
103 systemic risks, eg, if high computational power was used in their training, while minimal-risk systems, like spam  
104 filters, are subject to voluntary codes of conduct. Notably, the Act's extraterritorial reach ensures that AI systems  
105 affecting the EU market, regardless of where they are developed or hosted, are subject to its regulations.

106 A key feature of the Act is its harmonization with existing EU legislation, particularly in the healthcare sector.  
107 This harmonization aims to simplify the regulatory landscape, as AI systems already subject to the MDR or *In-*  
108 *Vitro-Diagnostic Medical Device Regulation* (IVDR) ideally would not have to meet separate AI Act requirements  
109 and comply with the standards set by both, avoiding the need for double certification.<sup>15-17</sup> However, it is  
110 anticipated that medical AI systems subject to the MDR or IVDR will still need to address both frameworks and  
111 coordinate their compliance efforts through designated notified bodies to ensure full regulatory alignment.<sup>17</sup>  
112 The Act's enforcement timeline is phased, beginning with voluntary compliance in August 2024.<sup>18</sup> Key deadlines  
113 include February 2025, when AI systems posing unacceptable risks must cease operations, and August 2027,  
114 when enforcement begins for medical devices Class IIa and higher that are not subject to biometric considerations.  
115 Non-EU member states within the European Free Trade Association are expected to regulate AI in accordance  
116 with the EU AI Act (Iceland, Norway, and Liechtenstein) or to align their own proposed legislation with the Act  
117 (Switzerland). This is similar for the current EU accession candidates, including Albania, Bosnia and  
118 Herzegovina, Georgia, Moldova, Montenegro, North Macedonia, Serbia, and Ukraine.

## 119 **United Kingdom**

120 The United Kingdom (UK) does not currently have specific legislation targeting AI, but existing regulations like  
121 the UK MDR cover software and autonomous decision-making systems, including AI, even though they were not  
122 explicitly designed for recent advancements in machine learning, deep learning, or generative AI. As outlined in  
123 a white paper titled *AI regulation: a pro-innovation approach* from the Department for Science, Innovation and  
124 Technology and Office for AI in August 2023, the UK's approach to AI regulation prioritizes a flexible, principles-  
125 based, and non-statutory framework interpreted by sector-specific regulators rather than introducing horizontal  
126 legislation like the EU AI Act.<sup>19</sup> In the healthcare sector, the Medicines and Healthcare products Regulatory  
127 Agency (MHRA) announced the *Software and AI as a Medical Device (SaMD/AIaMD) Change Programme* in  
128 2021 to ensure the UK MDR is fit for purpose for AIaMD.<sup>20</sup> At the current stage, this non-binding framework  
129 provides guidance on how to address challenges like transparency, risk management, and lifecycle validation for  
130 AIaMD and aims to complement the UK MDR. More recently, the government committed to regulating AI in  
131 July 2024.<sup>21</sup> Since then, however, the new administration has not proposed any specific legislation on AI.

## 132 United States

133 In the United States (US), while there is no horizontal federal legislation explicitly governing AI, existing laws  
134 such as the *Federal Food, Drug, and Cosmetic Act*, as amended by the *1976 Medical Device Amendments* and  
135 subsequent updates, regulate software, including autonomous systems and AI-based decision-making tools.<sup>22</sup>  
136 These regulations are enforced by the Food and Drug Administration (FDA), which has approved 1,016 AI- and  
137 machine-learning-enabled medical devices as of December 2024.<sup>23</sup> The FDA also addresses AI-specific  
138 challenges through initiatives such as the *21st Century Cures Act*, which exempts certain clinical decision support  
139 systems from regulation if they meet specific criteria, and detailed guidance on AI and machine learning software  
140 used in medical devices.<sup>24</sup> Additionally, the Office of the National Coordinator for Health Information Technology  
141 Systems' *Health Data, Technology, and Interoperability Certification Program* (HTI-1 Rule) regulates AI-based  
142 decision support systems within electronic health records, providing binding requirements for their  
143 interoperability and safety.<sup>25</sup>

144 The Biden administration's October 2023 *Executive Order on the Safe, Secure, and Trustworthy Development and*  
145 *Use of AI* (AI EO) directs federal agencies to develop standards, regulations, and oversight mechanisms for AI.<sup>26</sup>  
146 For healthcare, the EO guides the Department of Health and Human Services, including the FDA and the Centers  
147 for Medicare and Medicaid Services, in shaping strategies for AI adoption. This includes implementing provisions  
148 from the *Blueprint for the AI Bill of Rights* and earlier frameworks like the *National AI Initiative Act of 2020*, as  
149 well as forming the Office of the Chief AI Officer to oversee these efforts.<sup>27,28</sup> While these measures address  
150 issues such as transparency, risk management, and lifecycle validation for AI-based medical products, the EO  
151 itself is not statutory law, leaving its longevity uncertain amid administrative changes in January 2025.

152 Furthermore, states like California have proposed their own AI-specific legislation, such as the *Safe and Secure*  
153 *Innovation for Frontier AI Systems Act (Senate Bill SB-1047)*, including provisions for mandatory safety incident  
154 reporting, requirements for conducting safety assessments, third-party testing of AI models to ensure compliance  
155 with established standards, and civil penalties for non-compliance.<sup>29</sup> Meanwhile, federal efforts like the stalled  
156 *Algorithmic Accountability Act of 2022*, which aimed to establish assessment requirements for high-risk AI  
157 systems, underscore the ongoing debates surrounding comprehensive AI legislation.<sup>30</sup> Finally, the FDA has issued  
158 additional AI-specific guidance, such as its *Marketing Submission Recommendations for Predetermined Change*  
159 *Control Plans*, which focuses on managing updates in AI-enabled medical devices.<sup>31</sup>

## 160 **Canada**

161 In Canada, the regulation of AI in healthcare remains a work in progress. At the federal level, *the AI and Data Act*  
162 (AIDA) was introduced in June 2022 as part of Bill C-27, the *Digital Charter Implementation Act*.<sup>32</sup> AIDA  
163 proposes a risk-based framework for regulating AI systems, particularly high-impact applications, including those  
164 in healthcare, by requiring transparency and harm mitigation measures. However, as of December 2024, AIDA  
165 remains under parliamentary review and has yet to be enacted into law.

166 Furthermore, the 2023 federal *Guide on the Use of Generative AI* provides principles and best practices for  
167 responsible AI adoption within Canadian government operations.<sup>33</sup> It emphasizes ethical considerations,  
168 transparency, and accountability in deploying generative AI systems to support public services while mitigating  
169 risks.

170 Above all, in 2021, Health Canada, the FDA, and the UK MHRA jointly published the *Good Machine Learning*  
171 *Practice for Medical Device Development: Guiding Principles*, a framework that addresses the safety, efficacy,  
172 and transparency of AI and machine learning-enabled medical devices.<sup>34</sup> In June 2024, the authorities expanded  
173 this framework by introducing the *Transparency for Machine Learning-Enabled Medical Devices: Guiding*  
174 *Principles*, which provide for clear communication about the performance, intended use, development process,  
175 and logic of the devices.<sup>35</sup> Although, again, not legally binding frameworks, these principles aim to inform  
176 stakeholders in the healthcare sector, promote trust, and encourage informed use throughout the lifecycle of AI-  
177 driven medical devices in the UK, US, and Canada.

## 178 **Mexico**

179 In recent years, several digital health legislative initiatives have been proposed to the Mexican Senate, but none  
180 have been passed.<sup>36</sup> As of December 2024, the regulation of AI in healthcare remains under the jurisdiction of  
181 existing legal frameworks, including the *General Health Act* and the *Protection of Personal Data Held by Private*  
182 *Parties*.<sup>37,38</sup> In February 2024, a new legislative proposal, the *Federal Law Regulating AI*, was introduced to the  
183 Mexican Senate.<sup>39</sup> This proposed law aims to establish a legal framework for the development, deployment, and  
184 use of AI technologies across various sectors, including healthcare. Moreover, it proposes designating the Federal  
185 Telecommunications Institute (IFT) as the competent authority on AI matters and suggests the creation of a  
186 National Commission on AI to serve as an advisory body to the IFT. The law also classifies AI systems by risk  
187 levels as unacceptable, high, low, or minimal, similar to the EU AI Act, and outlines specific obligations and  
188 testing requirements for each category. Developers or providers of AI systems would be required to obtain prior

189 authorization from the IFT before commercializing their systems in Mexico, even if offered free of charge.  
190 However, as the legislative process involves multiple stages of review and approval, the exact timeline for the  
191 law's adoption remains uncertain. Furthermore, as with other previously proposed digital health legislation, it is  
192 still possible that the law will not pass the Senate.

### 193 **Central America and the Caribbean**

194 As of December 2024, countries in Central America and the sovereign states in the Caribbean have not  
195 implemented binding legislation specifically regulating AI. Instead, some countries have introduced national AI  
196 strategies or are participating in non-binding regional initiatives.

197 In Central America, Costa Rica was the first country to announce its national AI strategy, while the Dominican  
198 Republic was the first country in the Caribbean. Both frameworks focus on principles of ethical use, privacy, and  
199 societal benefit, serving as strategic guidance rather than legally enforceable regulations.<sup>40,41</sup>

200 Regional initiatives, such as the *UNESCO Caribbean AI Policy Roadmap*, provide a foundation for promoting  
201 innovation and establishing oversight for AI but do not constitute binding legislation.<sup>42</sup> Similarly, in August 2024,  
202 17 Latin American and Caribbean countries adopted the *Cartagena de Indias Declaration on AI*.<sup>43</sup> However, the  
203 declaration itself does not establish enforceable legal mechanisms but rather serves as a collaborative guideline  
204 for future policy development.

### 205 **South America**

206 In South America, no country has enacted AI-specific legislation. However, six countries, namely Brazil, Peru,  
207 Chile, Argentina, Colombia, and Ecuador, have drafted legal frameworks for AI.

208 Brazil's national AI strategy, based on the OECD AI Principles, was launched in 2021.<sup>44</sup> In December 2024, the  
209 Brazilian Senate approved an AI Framework (*Bill No. 2338/2023*), which was first proposed in May 2023.<sup>45</sup> This  
210 bill establishes a horizontal regulatory framework for AI, adopting a risk-based approach similar to the EU AI Act  
211 and implementing a dedicated regulatory authority. Until this framework is implemented, medical AI applications  
212 (classified as SaMD) are regulated by the National Health Surveillance Agency (ANVISA) under the existing  
213 ANVISA regulatory framework.<sup>46</sup>

214 In Peru, an updated draft of its AI governance legislation (*Law No. 31814*) was introduced in November 2024,  
215 building on the original proposal from May 2023.<sup>47</sup> The law adopts a risk-based framework for classifying AI  
216 systems and emphasizes developer accountability for ensuring safety, explainability, and reliability. Earlier, in



217 2020, Peru had enacted *Emergency Decree 007-2020*, which provided foundational guidelines for secure digital  
218 interactions, including principles and structures for oversight, monitoring, and cybersecurity.<sup>48</sup> So far, this decree  
219 encompasses AI within its broader regulatory scope, including AI-driven healthcare applications.

220 Chile issued its national AI policy in 2020, after which *Bill No. 16821-19* was developed and submitted to the  
221 Chamber of Deputies in May 2024.<sup>49,50</sup> The bill adopts a risk-based classification similar to the EU's AI Act and  
222 imposes obligations on high-risk applications, such as data governance, transparency, and human oversight. It  
223 also establishes the AI Technical Advisory Council, and grants enforcement authority to the Personal Data  
224 Protection Agency. As of December 2024, the bill is still under deliberation, and AI applications in healthcare fall  
225 under Chile's MDR framework.<sup>51</sup>

226 In 2021, Argentina began drafting a national AI plan as part of its *Innovative Argentina 2030 Plan* and *2030*  
227 *Digital Agenda*.<sup>52</sup> In June 2024, the Argentine Congress introduced *Bill 3003-D-2024*, which aims to establish a  
228 legal framework for the responsible use of AI.<sup>53</sup> As in other South American countries, the proposed legislation  
229 is inspired by the EU's AI Act and takes a risk-based approach to defining the obligations of AI providers and  
230 users. To date, AI-driven SaMD is regulated under the Argentine MDR.<sup>54</sup>

231 Colombia is also in the process of passing binding AI-specific legislation. In November 2023, the Senate passed  
232 *Law 059/23*, which establishes guidelines for the development, use, and regulation of AI as part of the *National*  
233 *Digital Strategy 2023-2026*.<sup>55,56</sup> The law emphasizes principles such as human oversight of AI, safety,  
234 cooperation, and the public good. It also calls for the establishment of a Commission on Data Processing and AI  
235 Development to draft technical regulations, advise Congress, and promote AI-driven innovation. As of December  
236 2024, the law is still under review, and SaMDs are regulated under the National Institute for Food and Drug  
237 Surveillance's MDR.

238 Ecuador's efforts to adopt AI legislation resulted in the proposal of a draft *Organic Law for the Regulation and*  
239 *Promotion of AI* in July 2024, which establishes a risk-based framework for the safe and ethical use of AI while  
240 promoting innovation across sectors.<sup>57</sup> This follows earlier initiatives, such as the *2022 Digital Transformation*  
241 *Agenda* and the establishment of an AI Committee under the *Organic Law for Digital and Audiovisual*  
242 *Transformation* in 2023.<sup>58,59</sup> Until the law is enacted, SaMDs are governed by the National Agency for  
243 Regulation's medical device framework.

244 The last country in South America to draft a national AI strategy for public consultation was Uruguay in October  
245 2024.<sup>60</sup> Other countries, including Venezuela, Paraguay, and Bolivia, have yet to develop national frameworks or  
246 introduce AI-specific legislation.

## 247 **China**

248 Over the past few years, China's regulatory framework for governing AI applications in healthcare has developed  
249 steadily, mainly under the direction of the National Medical Products Administration and the National Health  
250 Commission. Starting in July 2021, the *Guidelines for the Classification and Definition of AI Medical Software*  
251 *Products* were issued to define management attributes and risk-based classifications for AI-based medical  
252 software.<sup>61</sup> Concurrently, the *Guidelines for the Naming of General Names for Medical Software* standardized  
253 naming conventions by requiring a core term and two descriptive feature terms for product clarity and  
254 consistency.<sup>62</sup>

255 In March 2022, the regulatory landscape expanded with the *Guidelines for the Registration and Review of AI*  
256 *Medical Devices*, which standardized submission requirements and technical review processes, alongside the  
257 *Guidelines for the Registration and Review of Medical Device Software (2022 Revised Edition)* and the *Guidelines*  
258 *for the Registration and Review of Medical Device Cybersecurity (2022 Revised Edition)*, guiding the technical  
259 evaluation and foster cybersecurity.<sup>63-65</sup> In addition to the cross-specialty guidance of AI applications in  
260 healthcare, one of the first guidelines for specific medical applications of AI was issued with the *Guidelines for*  
261 *the Registration Review of Pulmonary Nodule CT Image Assisted Detection Software* in May 2022, followed by  
262 the *Guidelines for the Registration and Review of Diabetic Retinopathy Fundus Image Aided Diagnosis Software*  
263 in July 2022.<sup>66,67</sup>

264 In July 2023, China introduced the *Interim Measures for the Administration of Generative AI Services* to regulate  
265 generative AI applications across industries, emphasizing ethical governance, transparency, and risk mitigation.<sup>68</sup>

266 In addition, Chinese legal scholars proposed a draft *AI Law* in March 2024, which aims to provide a horizontal  
267 legal framework for AI developed and deployed in China.<sup>69</sup> It includes provisions on AI-related risks, intellectual  
268 property, data security, and bias mitigation across industries and may complement or replace some of the  
269 introduced sector-specific guidelines.

270 Most recently, the National Medical Products Administration released the *Medical Device Administration Law*  
271 for public consultation on August 28, 2024.<sup>70</sup> This draft law presents the first overarching regulatory framework  
272 in China for the entire life cycle of medical devices, including research and development (R&D), manufacturing,

273 distribution, and use. It remains to be seen whether this law will also apply to AI-based medical devices,  
274 potentially replacing previous administrative regulations with limited legal authority.

## 275 **Japan**

276 In Japan, several non-binding general guidelines for the development and use of AI have been published in recent  
277 years. Notable among these are the *AI R&D Guidelines* (2017), the *AI Utilization Guidelines* (2019), and the  
278 *Governance Guidelines for Implementation of AI Principles Version 1.1* (2022).<sup>71-73</sup> These have recently been  
279 updated and consolidated into *the AI Guidelines for Business Version 1.0*, which was released in April 2024.<sup>74</sup>  
280 However, all of these guidelines are intended to serve as 'soft law' without legally binding responsibility and do  
281 not explicitly target AI applications in healthcare.

282 At the same time, as part of the G7 Hiroshima AI Process, Japan contributed to the development of the *Hiroshima*  
283 *Process International Guiding Principles for Organizations Developing Advanced AI Systems*.<sup>10</sup> These principles  
284 aim to promote safe, secure, and trustworthy AI worldwide and provide guidance for organizations developing  
285 and using advanced AI systems, including foundational models and generative AI systems.

286 An AI Strategy Council, established in May 2023, has also produced a *Tentative Summary of AI Issues*,  
287 highlighting the need to revise existing guidelines in light of the proliferation of generative AI.<sup>75</sup>

288 In addition, in February 2024, a working group proposed basic concepts for a *Basic Law for the Promotion of*  
289 *Responsible AI*, which would introduce binding legal requirements for certain generative AI foundational  
290 models.<sup>76</sup> However, as of December 2024, there is no publicly available draft. If adopted, this framework would  
291 shift Japan's previous reliance on soft law to a legally enforceable model, at least for advanced AI models,  
292 including regulation of their use in healthcare.

## 293 **Korea**

294 In 2019, the South Korean government released its national AI strategy to foster AI adoption, including  
295 investments in R&D, workforce training, and ethical AI practices to support responsible innovation, followed by  
296 several national and international initiatives, such as the *Digital New Deal* and the *Seoul Declaration for Safe,*  
297 *Innovative and Inclusive AI*.<sup>77-79</sup>

298 While multiple AI-specific bills were introduced during the 21st National Assembly, these proposals failed to pass  
299 before the Assembly's term ended in May 2024.<sup>80</sup> However, as a legally binding effort to regulate AI-driven  
300 decision-making, the *Personal Information Protection Act* was amended in March 2023. These amendments give

301 individuals the right to opt out of AI-driven decisions that affect their rights or to request explanations for such  
302 decisions.<sup>81</sup>

303 Most recently, the 22nd National Assembly passed a legal framework on the *Development of AI and Creation of*  
304 *Trust Base* (AI Basic Act) through the subcommittee stage in November 2024, which consolidates nineteen  
305 previous AI-related proposals into a single framework.<sup>82,83</sup> The draft law adopts a risk-based approach, imposes  
306 transparency requirements, establishes risk management systems, and enforces penalties for non-compliance,  
307 mirroring elements of the EU AI Act. The South Korean Act now awaits approval by the Judiciary Committee  
308 and a final plenary session. If enacted, it will serve as South Korea's first overarching legislation dedicated to AI,  
309 including the regulation of AI applications in the healthcare sector. Concurrently, the government plans to  
310 establish an AI Safety Research Institute under the Ministry of Science and Information and Communication  
311 Technology.<sup>84</sup>

312 In contrast to South Korea's proactive approach to AI governance, North Korea does not have any publicly  
313 available formal regulations or policies governing the development or application of AI as of December 2024.

#### 314 **South Asia**

315 As of December 2024, no country in South Asia, including Afghanistan, Bangladesh, Bhutan, India, Maldives,  
316 Nepal, Pakistan, and Sri Lanka, has enacted AI-specific legislation.

317 In May 2023, Pakistan's Ministry of Information Technology and Telecommunications unveiled a draft *National*  
318 *AI Policy* as part of its Digital Pakistan vision.<sup>85</sup> Although the policy does not elaborate on specific regulatory  
319 approaches, it proposes the establishment of an AI Directorate under the National Commission for Personal Data  
320 Protection to oversee the ethical use of AI and suggests the creation of AI regulatory sandboxes for controlled  
321 implementation of AI. However, as of December 2024, the policy remains in draft form.

322 In India, the Ministry of Electronics and Information Technology announced plans to introduce a Digital India  
323 Act (DIA) to replace the existing Information Technology Act of 2000.<sup>86,87</sup> The DIA aims to address contemporary  
324 challenges in the digital ecosystem, including the regulation of emerging technologies such as AI. However, as of  
325 December 2024, the draft has not been released for public consultation.

326 Other countries, such as Bangladesh, Nepal, and Sri Lanka, have issued national AI strategies and concept papers,  
327 some of which aim to establish a regulatory framework for AI, but without any concrete provisions to date.<sup>88-90</sup>

328 Most recently, the Maldivian government announced that it will develop an AI master plan in October 2024.<sup>91</sup>  
329 Countries such as Bhutan and Afghanistan have not explicitly issued national policies or strategies.

### 330 Southeast Asia

331 In Southeast Asia, seven Association of Southeast Asian Nations (ASEAN) member states, including Singapore,  
332 Vietnam, Thailand, Indonesia, Malaysia, Cambodia, and the Philippines, have introduced national AI strategies.  
333 At the regional level, ASEAN launched the *ASEAN Guide on AI Governance and Ethics* in February 2024,  
334 adopting a market-driven approach to balance AI's benefits with its risks.<sup>92</sup> However, none of these countries have  
335 legally binding AI legislation as of December 2024, with Thailand, the Philippines, and Vietnam being the only  
336 countries that issued draft laws specifically dedicated to AI regulation.

337 Singapore does not have specific laws directly regulating AI but adopts a soft-law approach through frameworks  
338 and sectoral guidelines. Key initiatives include the *Model AI Governance Framework* (2019, updated in 2020),  
339 the *AI Verify* governance toolkit, and the *National AI Strategy 2.0* (2023).<sup>93-95</sup> In May 2024, a draft *Generative AI*  
340 *Governance Framework* was issued to address emerging AI challenges, providing updated recommendations for  
341 the secure development and adoption of AI, and is currently under public consultation.<sup>96</sup>

342 Currently, Indonesia regulates AI applications under the pre-existing *Electronic Information and Transactions*  
343 *Law*, which was amended to define AI as an electronic agent.<sup>97,98</sup> Key principles for AI operators include prudence,  
344 system security, cost efficiency, and consumer protection, with liability typically falling on operators unless user  
345 negligence is proven. In 2020, the *National Strategy on AI 2020–2045* (Stranas KA) was introduced as a  
346 framework for ministries and stakeholders to guide AI policy and development.<sup>99</sup> In December 2023, the  
347 government adopted non-legally binding key ethical guidelines (*Circular Letter No. 9 of 2023*).<sup>100</sup> More recently,  
348 in September 2024, the Deputy Minister of Communication and Information announced plans to issue a ministerial  
349 regulation on AI, aiming to provide guidelines for AI use, though no draft or concrete details have been released  
350 so far.<sup>101</sup>

351 Thailand does not have any AI-specific legislation in force. However, in early 2023, two draft laws were  
352 introduced: the *Royal Decree on Business Operations that Use AI Systems*, which proposes a risk-based regulatory  
353 framework, and the *Draft Act on the Promotion and Support of AI Innovations*, designed to promote AI  
354 development while ensuring consumer protection.<sup>102,103</sup> In addition, Thailand has issued non-binding *AI Ethics*  
355 *Guidelines* and *AI Governance Guidelines* to provide interim principles for ethical AI development and  
356 deployment.<sup>104,105</sup>

357 Similarly, Vietnam's Ministry of Information and Communication issued a draft *Digital Technology Industry Law*  
358 for public consultation, proposing regulations for AI.<sup>106</sup> The draft outlines ethical principles for AI development  
359 and use, requires labeling of AI-generated digital products to ensure they are identifiable as artificially created or

360 manipulated, and introduces a risk-based classification of AI systems based on their impact on health, safety,  
361 rights, and critical infrastructure, with regulatory measures tailored to each risk level.

362 In Malaysia, the government published a *National AI Roadmap* in 2023, under which a National AI Office was  
363 launched in December 2024 to oversee policy formulation and regulatory frameworks.<sup>107,108</sup> Additionally, The  
364 *National Guidelines on AI Governance and Ethics* published in September 2024 provide foundational principles  
365 for ethical AI use, although not legally binding.<sup>109</sup>

366 On March 1, 2023, the Philippines introduced the *AI Development and Regulation Act (HB7396)* in the House of  
367 Representatives.<sup>110</sup> The Act aims to promote safe AI development that is aligned with ethical principles and public  
368 interest. It proposes the establishment of an AI Development Authority to oversee the licensing, certification, and  
369 regulation of AI developers and deployers, requiring mandatory registration and compliance with issued  
370 guidelines. Non-compliance would result in penalties, with the Act set to take effect 15 days after publication in  
371 the *Official Gazette*. However, there have been no updates to the law since the publication of the draft.

372 Other ASEAN member states, such as Brunei, are still in the process of developing non-binding codes and  
373 guidelines to govern the use of AI.<sup>111</sup>

## 374 **Russian Federation**

375 The Russian Federation was one of the first countries to adopt AI-specific legislation. Beginning in 2019, Russia  
376 adopted its *National Strategy for the Development of AI (2019-2030)*, which highlights the role of AI innovation  
377 in the country while emphasizing the need for regulation to ensure safety and ethical compliance.<sup>112</sup> In 2020,  
378 *Federal Law No. 123-FZ* was adopted with the aim of creating experimental legal regimes through the  
379 establishment of regulatory sandboxes for AI technologies in Moscow, allowing for the testing of AI systems in  
380 controlled environments.<sup>113</sup> With the original framework set to expire in 2025, policymakers have drafted an  
381 updated law on AI that will expand on the original federal law with regulations on accountability for AI actions  
382 and intellectual property ownership of AI-generated outputs.<sup>114</sup> Specific to the healthcare sector, the Ministry of  
383 Health issued standards for the certification of (AI-based) medical software in August 2021, requiring conformity  
384 assessment in compliance with Russian government standards, focusing on data security and system reliability.<sup>115</sup>

385 In addition, *Federal Law No. 258-FZ*, adopted in 2021, established a nationwide legal framework for regulatory  
386 sandboxes in the field of digital innovation, including medical activities.<sup>116</sup>

## 387 **Central Asia, South Caucasus, and Mongolia**

388 Mongolia and countries in Central Asia and the South Caucasus currently lack AI-specific legislation. Kazakhstan,  
389 Central Asia's largest economy, is focusing on advancing its AI ecosystem through national initiatives like the  
390 *Digital Transformation and Cybersecurity Concept (2023–2029)* and the *Concept for the Development of AI for*  
391 *2024-2029*, including a national AI platform, and an AI Committee tasked with creating and implementing  
392 policies.<sup>117,118</sup> Although an AI-specific law is planned as part of the AI development concept, no draft has been  
393 finalized as of December 2024. Notably, Kazakhstan has also introduced AI sandboxes that focus on the safe  
394 development of AI in controlled environments, similar to Uzbekistan, where a national AI strategy has also been  
395 adopted.<sup>119,120</sup> On the other hand, Tajikistan and Kyrgyzstan have also adopted national AI strategies, but these do  
396 not address the regulation of AI or the establishment of AI regulatory sandboxes, while Turkmenistan has yet to  
397 adopt a national AI strategy or legislation.<sup>121,122</sup>

398 At the regional level, the Commonwealth of Independent States introduced a non-binding model AI law in April  
399 2024 to promote uniform regulatory approaches, though its practical impact remains questionable.<sup>123</sup> Similarly,  
400 the Organization of Turkic States adopted the *Garabagh Declaration* in July 2024, signaling intentions to  
401 collaborate on AI policies, but concrete details are yet to be released.<sup>124</sup>

402 In the South Caucasus, Azerbaijan and Armenia are still in the process of developing national AI strategies and  
403 lack specific regulatory frameworks.<sup>125,126</sup> In contrast, Mongolia adopted an action plan for 2024-2028 in August  
404 2024, outlining goals for regulatory and big data policy improvements, but details have yet to be published.<sup>127</sup>

## 405 **Middle East**

406 The Middle East presents a dynamic yet heterogeneous landscape for the regulation of AI in healthcare,  
407 characterized by countries at different stages of developing and implementing regulatory frameworks. Advanced  
408 economies such as the United Arab Emirates (UAE), Saudi Arabia, Qatar, Turkey, and Israel are leading the  
409 region with structured approaches, although in many cases, regulatory efforts focus on non-binding guidelines  
410 rather than enforceable legislation. Most notably, Bahrain was the first country in the Middle East to adopt a stand-  
411 alone law to regulate AI in April 2024, which includes 38 articles on privacy, unlicensed activities, and the risks  
412 of AI systems, with penalties for non-compliance and the establishment of an AI judicial unit for oversight and  
413 enforcement.<sup>128</sup>

414 In the UAE, the regulatory landscape is characterized by a combination of federal initiatives and jurisdiction-  
415 specific frameworks, particularly in its financial free zones, such as the Abu Dhabi Global Market and the Dubai

416 International Financial Centre (DIFC).<sup>129</sup> At the federal level, the UAE appointed a Minister for AI in 2017,  
417 followed by issuing the *UAE National Strategy for AI 2031* in 2018 and several non-binding guidelines aimed at  
418 integrating AI across various sectors.<sup>130</sup> Additionally, the UAE published the *UAE Charter for the Development*  
419 *and Use of AI* in June 2024, which serves as a guiding framework to protect the rights of the UAE community in  
420 the development or use of AI solutions and technologies.<sup>131</sup> In healthcare, certain regulatory measures for AI are  
421 being implemented through existing legal frameworks. For example, the DIFC has amended its data protection  
422 regulations to address the use of AI in personal data processing, imposing obligations on entities operating  
423 autonomous and semi-autonomous systems and emphasizing responsible data management.<sup>132</sup> However, as of  
424 December 2024, neither the UAE mainland nor the financial free zones have enacted binding, AI-specific  
425 regulations.

426 Saudi Arabia has not issued any AI-specific legislation and instead focuses on non-binding guidelines. In  
427 September 2023, the Saudi Data and AI Authority (SDAIA) released a draft entitled *AI Ethics Principles*, which  
428 focuses on fairness, privacy, transparency, accountability, and security.<sup>133</sup> In healthcare, the Saudi Food and Drug  
429 Authority has introduced a guidance document for AI and machine learning-based medical devices, which  
430 addresses safety, data governance, and compliance.<sup>134</sup> More recently, the SDAIA issued the *AI Adoption*  
431 *Framework* in September 2024, which provides guidelines for the responsible integration and implementation of  
432 AI technologies across sectors, emphasizing ethical principles, transparency, accountability, and alignment with  
433 Saudi Arabia's *Vision 2030*.<sup>135,136</sup>

434 Qatar, aligning with its *National Vision 2030*, launched a national AI strategy in 2019 and established an AI  
435 Committee in 2021 to oversee its implementation.<sup>137,138</sup> In 2024, Qatar's National Cybersecurity Agency issued  
436 the non-binding *Guidelines for Secure Usage and Adoption of AI*, emphasizing responsible use, risk management,  
437 ethical principles, and stakeholder confidence, with a specific focus on generative AI and organizational  
438 compliance.<sup>139</sup>

439 Turkey, while aligned with EU regulations like MDR/IVDR under the Customs Union and not directly covered  
440 by the EU AI Act, is actively developing its own AI regulatory framework. In August 2021, the *National AI*  
441 *Strategy (2021-2025)* was issued, emphasizing the goal to align Turkey's AI governance with international  
442 standards, promoting the responsible use of AI across sectors, including healthcare.<sup>140</sup> Building on this strategy, a  
443 *Draft Law on AI* was submitted to the Grand National Assembly in June 2024.<sup>141</sup> While the draft law outlines  
444 principles such as safety, transparency, fairness, accountability, and data protection and defines roles within the  
445 AI ecosystem, it contains limited provisions on the regulation of AI.<sup>142</sup> It remains to be determined whether this



446 law will be implemented in its current form, expanded upon, or supplemented by additional regulations to achieve  
447 a more comprehensive regulatory framework.

448 After publishing a white paper on the responsible development of AI in November 2022, Israel's Ministry of  
449 Innovation, Science, and Technology of Israel, in collaboration with the Ministry of Justice, proposed its first  
450 *Policy on AI Regulation and Ethics in December* (AI Policy) in December 2023.<sup>143</sup> The AI Policy emphasizes  
451 human-centric AI, equality, transparency, accountability, and system reliability, adopting a risk-based, sector-  
452 specific approach aligned with international standards like the EU AI Act. However, this policy aims at 'soft  
453 regulation' through the use of non-binding ethical principles, voluntary standards, and both monitored and  
454 unmonitored self-regulation.

455 Other countries in the Middle East, including Jordan, Lebanon, Oman, Kuwait, and Palestine, have drafted or  
456 adopted national AI strategies; however, these strategies remain primarily focused on promoting innovation rather  
457 than establishing specific legislative frameworks for AI governance.<sup>144-148</sup> In contrast, countries like Yemen, Iran,  
458 Iraq, and Syria currently have no formal AI framework or policy in place.

## 459 **African Union**

460 Within the African Union (AU), several countries have issued national AI strategies that predominantly focus on  
461 capacity building, research, and innovation rather than on the regulation of AI, with healthcare often highlighted  
462 as a priority sector. Most recently, Algeria adopted its national AI strategy in December 2024, aiming to promote  
463 AI technologies in key sectors such as agriculture, health, and industry while simultaneously working on a  
464 regulatory framework for AI.<sup>149</sup> As such, Algeria follows the lead of other AU member states that published  
465 national strategies, including Morocco, Zambia, Senegal, Nigeria, South Africa, Ethiopia, and Libya in 2024,  
466 Benin in 2023, Ghana and Rwanda in 2022, Egypt in 2019, and Tunisia and Mauritius in 2018.<sup>150-162</sup>

467 Other countries within the AU, like Kenya and Tanzania, are actively developing AI strategies. In April 2024,  
468 Kenya's Ministry of Information and Communication Technology and Digital Economy, in partnership with the  
469 German International Cooperation Society, launched the national AI strategy development process.<sup>163</sup> In the past,  
470 Kenya has also proposed the *Kenya Robotics and AI Society Bill* to promote the ethical and responsible  
471 development of AI technologies, which, however, is still in the draft stage.<sup>164</sup>

472 Tanzania issued a *Policy Framework for AI in Tanzania Health Sector* in 2022 and is reportedly in the process of  
473 formulating a national AI strategy for the management of AI and the protection of the public.<sup>165,166</sup>

474 On a continental level, the AU has been proactive in advancing AI governance. Following initiatives like the AU's  
475 *Digital Transformation Strategy for Africa (2020-2030)* and the *AI Data Policy Framework of 2022*, the AU  
476 Executive Council endorsed the *Continental AI Strategy* in July 2024, a framework to guide AI governance and  
477 development across its 55 member states.<sup>4,167</sup> The strategy prioritizes harnessing AI's benefits, building  
478 capabilities, mitigating risks, stimulating investments, and fostering cooperation. Central to the strategy is AI  
479 governance, viewed as critical for responsible AI adoption, addressing societal, ethical, and legal challenges while  
480 aligning with Africa's development goals under the *Agenda 2063*.<sup>168</sup> Key measures include implementing or  
481 updating existing legal frameworks (eg, on data protection and cybersecurity), identifying regulatory gaps, and  
482 fostering cross-border data sharing to support AI development. The strategy also advocates for independent  
483 oversight bodies, ethical principles, and collaborative efforts among stakeholders to balance innovation and risk  
484 management. Implementation is planned in phases (2025-2030), aiming to harmonize AI governance across  
485 member states to ensure inclusive, fair, and sustainable AI-driven growth. Since most national strategies do not  
486 focus on the regulation of AI, the AU's anticipated *Continental AI Strategy* marks a critical step towards a uniform  
487 development of legislation, including the application of AI in healthcare. While national strategies aim to build  
488 infrastructure, capacity, and awareness around AI, regulatory gaps remain that the continental framework could  
489 address.

## 490 **Oceania**

491 In Australia, the *Therapeutic Goods Act 1989*, which includes the regulation of medical devices, and the *Privacy*  
492 *Act 1988*, which includes ensuring the security of patient data and health records, have undergone significant  
493 reforms to adapt to the rapidly evolving AI landscape since 2021, with the most recent update in August  
494 2024.<sup>169-171</sup> The purpose of these reforms is to ensure that medical AI devices are evaluated and assessed for  
495 safety while balancing the risks of over-regulation. Notably, the concept is similar to the EU's MDR in many  
496 aspects, following a risk-based approach. Furthermore, the Therapeutic Goods Administration's (TGA)  
497 regulatory principles include a specific provision for transparency, which excludes companies that rely on the  
498 'black box' approach to protect their technology.

499 In New Zealand, the *Therapeutic Products Act 2023* was introduced to regulate SaMD; however, it does not  
500 include specific provisions for AI technologies.<sup>172</sup> Healthcare data in New Zealand is governed under the *Privacy*  
501 *Act 2020*, which provides a framework for the use and protection of patient data but similarly does not explicitly

502 address AI.<sup>173</sup> Thus, similar to much of the Oceania region, including smaller Pacific island states, there are  
503 currently no specific regulations governing the use of AI in New Zealand.

504 Looking ahead, the Australian Government is actively reviewing existing legislation and has initiated public and  
505 stakeholder consultation on mandatory guardrails for AI through a document titled *Safe and Responsible AI in*  
506 *Health Care – Legislation and Regulation Review* (Proposals Paper).<sup>174</sup> Concurrently, the TGA has recently  
507 completed its own consultation to modernize AI regulation, aiming to streamline laws that protect patients while  
508 fostering innovation and improving healthcare outcomes.<sup>175</sup> In New Zealand, the Ministry of Business, Innovation,  
509 and Employment published a cabinet paper in July 2024 detailing its strategy for AI regulation, emphasizing the  
510 importance of encouraging AI adoption through a 'light-touch,' balanced, and risk-based approach.<sup>176</sup>

## 511 **Conclusions and Outlook**

512 Our analysis provides a global overview of the regulatory landscape for AI, with a focus on healthcare, covering  
513 the status quo of 197 countries and territories as of December 2024 (see Figure 1). As a reference for the reader,  
514 we provide an interactive online version of Figure 1, where details of the regulatory status for each country and  
515 territory can be accessed, and which we intend to update regularly.<sup>177</sup>

516

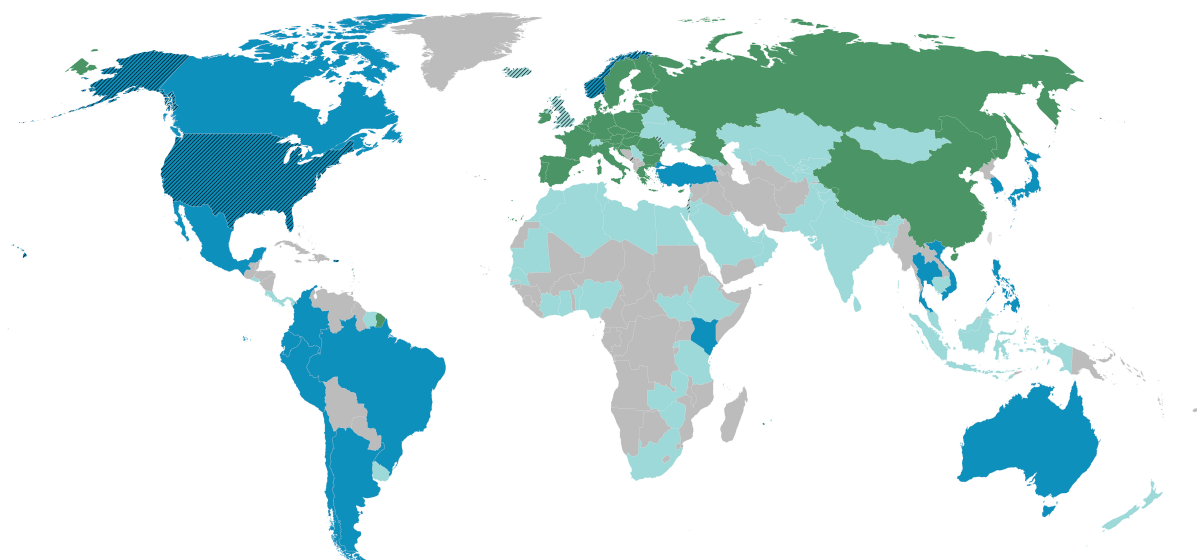

517  
518 **Figure 1. World map depicting the regulatory landscape of artificial intelligence (AI) as of December 2024.**  
519 Countries or territories are color-coded based on their regulatory approach. Dark green represents countries or  
520 territories that have adopted AI-specific legislation, while dark blue indicates those that have drafted AI-specific  
521 legislation but have not yet adopted it. Turquoise represents countries or territories that have issued non-legally

522 binding national AI guidance documents. Grey-highlighted countries or territories have neither introduced AI-  
523 specific legislation nor issued guidance. Countries or territories patterned with black diagonal lines have signed  
524 the Council of Europe's Framework Convention on AI. We also provide an interactive online version of this map,  
525 which provides details on the status of individual countries or territories when hovered over and which the authors  
526 intend to update regularly.<sup>177</sup>

527

528 We found that only 15.2% (n=30/197) of countries or territories have implemented legally binding AI-specific  
529 legislation (ie, legislation explicitly tailored to AI). Notably, the 27 EU Member States account for 90% (n=27/30)  
530 of countries with legislation following the recent adoption of the EU AI Act. The remaining three countries,  
531 Bahrain, the Russian Federation, and China, have adopted different national AI legislative frameworks that reflect  
532 their national priorities and strategies.

533 A further 9.1% (n=18/197) of countries or territories have drafted AI-specific legislation, signaling their intention  
534 to implement legally binding frameworks, although these drafts are still under review or in the legislative pipeline.

535 Meanwhile, 28.4% (n=56/197) have issued non-legally binding guidance documents that provide  
536 recommendations or frameworks for AI development and governance. Notably, these documents often focus on  
537 ethical principles, transparency, and fostering innovation rather than adopting AI-specific regulatory frameworks.

538 Finally, 47.2% (n=93/197) of countries or territories have yet to introduce any form of AI-specific legislation or  
539 guidance. This lack of regulatory guidance highlights disparities in global readiness for AI governance,  
540 particularly when comparing the Global North and South. Of the 136 countries or territories classified as Global  
541 South according to the Finance Center for South-South Cooperation, 60.3% (n=82/136) had no national  
542 framework or AI-specific legislation, compared to 18% (n=11/61) in the Global North.<sup>178</sup> Meanwhile, 30.9%

543 (n=42/136) in the Global South had national AI strategies, compared to 23% (n=14/61) in the Global North.

544 Furthermore, 7.4% (n=10/136) of countries or territories in the Global South had drafted AI-specific legislation,  
545 compared with 13.1% (n=8/61) in the Global North, and only 1.5% (n=2/136) in the Global South had enacted  
546 such legislation, compared with 45.9% (n=28/61) in the Global North.

547 Most importantly, the lack of such targeted legislation does not necessarily mean that AI-based medical devices  
548 are unregulated. Rather, these technologies are subject to the same safety, quality, and efficacy standards that  
549 apply to all medical devices in most countries and territories. Many in the medical device industry view an  
550 approach that focuses on updating existing regulations, such as the EU's MDR and *General Data Protection*  
551 *Regulation*, as a more effective alternative to enacting entirely new horizontal legislation.<sup>179,180</sup> For example,

552 although the EU's AI Act will be closely aligned with the MDR/IVDR, there is no evidence at present to suggest  
553 that providing updated guidance and standards under the current medical device framework will be any less  
554 effective in regulating AI-driven healthcare solutions.

555 However, for countries without established national AI governance frameworks, intergovernmental and  
556 international initiatives present viable pathways for guiding the development of regulatory systems. For instance,  
557 the AU's *Continental AI Strategy* aims to address governance challenges across the continent, where we found  
558 that 35 countries or territories have no AI-specific frameworks or legislation.<sup>4</sup> In Latin America, 17 countries  
559 formalized their commitment to regional AI governance through the adoption of the *Cartagena Declaration on*  
560 *AI* in August, while the ASEAN *Guide on AI Governance and Ethics*, published in February 2024, provides a  
561 framework for cooperation and governance in Southeast Asia.<sup>43,92</sup> While non-binding, these frameworks may help  
562 advance regional AI governance by promoting the adoption of AI-specific regulatory frameworks through  
563 standardized principles, common approaches, and coordinated mechanisms to address the ethical, legal, and  
564 socioeconomic implications of AI governance and deployment.

565 In contrast to non-binding intergovernmental frameworks, the Council of Europe's *Framework Convention on AI*,  
566 adopted in May 2024, establishes the first legally binding international treaty on AI governance.<sup>13</sup> The Convention  
567 requires that AI systems adhere to principles rooted in the protection of human rights, democracy, and the rule of  
568 law. To ensure compliance, the Conference of the Parties monitors adherence, provides recommendations, and  
569 facilitates collaboration through mechanisms such as public hearings. Member states are obligated to maintain  
570 transparency and accountability by documenting AI systems, ensuring accessible information for affected  
571 individuals, providing avenues to challenge AI-driven decisions, and establishing formal complaint mechanisms.  
572 As of December 2024, nine non-EU states with varying levels of progress in the adoption of horizontal AI  
573 regulation, including Andorra, Iceland, Israel, Moldova, Montenegro, Norway, San Marino, the UK, and the US,  
574 have signed the Convention. Notably, none of these nine countries have yet adopted their own horizontal binding  
575 frameworks for AI-specific governance. In this context, the Framework Convention serves as a promising solution  
576 to engage in collective governance, setting minimum standards while allowing flexibility for national adaptation.  
577 However, it remains to be determined whether such high-level international frameworks will be sufficiently  
578 implemented in legislation and enforced in individual countries.

579 In conclusion, the global landscape of AI governance is characterized by substantial disparities, marked by the  
580 uneven introduction of AI-specific regulatory frameworks and binding legislation, particularly between the Global  
581 North and South. Addressing these inequities necessitates international cooperation and the establishment of

582 robust governance mechanisms. These mechanisms must prioritize inclusivity, equity, and adaptability to ensure  
583 the responsible deployment of AI technologies while promoting equitable access and opportunities across diverse  
584 socioeconomic contexts. However, while new AI-specific regulations may offer tailored approaches to emerging  
585 challenges, the absence of such legislation does not imply a lack of oversight for AI-based medical devices, as  
586 many are already governed under existing regulatory frameworks, with no evidence at present to suggest that  
587 updated guidance and standards would be any less effective in regulating AI-driven healthcare solutions.

## 588 **Acknowledgements**

589 This work is supported by the European Union under the Horizon Europe Program as part of the project  
590 CYMEDSEC (101094218), ASSESS-DHT (101137347), and COMFORT (101079894). Views and opinions  
591 expressed are, however, those of the authors only and do not necessarily reflect those of the European Union. The  
592 European Union cannot be held responsible for them. The funding had no role in the study design, data collection  
593 and analysis, manuscript preparation, or decision to publish.

## 594 **Contributors**

595 Conceptualization: Felix Busch, Stephen Gilbert, Esteban Ortiz-Prado, Keno K Bressemer; Project administration:  
596 Felix Busch; Resources: Felix Busch, Stephen Gilbert, Esteban Ortiz-Prado, Keno K Bressemer; Software: Felix  
597 Busch; Data curation: Felix Busch, Raym Geis, Yuan-Cheng Wang, Noor Al Khori, Israel K Kolawole, Warren  
598 Clements, Stephen Gilbert; Funding acquisition: Stephen Gilbert; Investigation: Felix Busch, Raym Geis, Yuan-  
599 Cheng Wang, Noor Al Khori, Israel K Kolawole, Warren Clements, Stephen Gilbert; Methodology: Felix Busch,  
600 Raym Geis, Yuan-Cheng Wang, Noor Al Khori, Israel K Kolawole, Warren Clements, Stephen Gilbert;  
601 Supervision: Felix Busch, Stephen Gilbert, Esteban Ortiz-Prado, Keno K Bressemer; Validation: Felix Busch, Raym  
602 Geis, Yuan-Cheng Wang, Jakob Nikolas Kather, Noor Al Khori, Marcus R Makowski, Israel K Kolawole, Daniel  
603 Truhn, Warren Clements, Stephen Gilbert, Lisa C Adams, Esteban Ortiz-Prado, Keno K Bressemer; Visualization:  
604 Felix Busch; Writing – original draft preparation: Felix Busch, Raym Geis, Yuan-Cheng Wang, Noor Al Khori,  
605 Israel K Kolawole, Warren Clements, Stephen Gilbert; Writing – review & editing: Felix Busch, Raym Geis,  
606 Yuan-Cheng Wang, Jakob Nikolas Kather, Noor Al Khori, Marcus R Makowski, Israel K Kolawole, Daniel  
607 Truhn, Warren Clements, Stephen Gilbert, Lisa C Adams, Esteban Ortiz-Prado, Keno K Bressemer.

## 608 **Declaration of interests**

609 Outside the submitted work, the authors declare the following competing interests: Keno K Bressemer reports grants  
610 from the European Union (101079894), the Wilhelm Sander Foundation, the Bundesministerium für Bildung und  
611 Forschung (BMBF), the Else Kröner Foundation, Bayern Innovativ, and the Max Kade Foundation; Keno K  
612 Bressemer reports speaker fees from Canon Medical Systems Corporation and GE Healthcare; Keno K Bressemer is  
613 a member of the advisory board of the EU Horizon 2020 LifeChamps project (875329) and the EU IHI project  
614 IMAGIO (101112053); Daniel Truhn holds stocks in StratifAI GmbH and Synagen GmbH; Stephen Gilbert  
615 reports grants from the Horizon Europe Program as part of the projects ASSESS-DHT (101137347) and

616 CYMEDSEC (101094218) and funding through a BMBF project (Personal Mastery of Health & Wellness Data,  
617 PATH) on consent in health data sharing, financed through the European Union NextGenerationEU program;  
618 Stephen Gilbert reports nonfinancial interest as an Advisory Group member of the EY-coordinated "Study on  
619 Regulatory Governance and Innovation in the field of Medical Devices" conducted on behalf of the DG SANTE  
620 of the European Commission. Stephen Gilbert is the coordinator of a BMBF project (Personal Mastery of Health  
621 & Wellness Data, PATH) on consent in health data sharing, financed through the European Union  
622 NextGenerationEU program; Stephen Gilbert declares the following competing financial interests: he has or has  
623 had consulting relationships with Una Health GmbH, Lindus Health Ltd., Flo Ltd., Thymia Ltd, FORUM Institut  
624 für Management GmbH, High-Tech Gründerfonds Management GmbH, Prova Health Ltd, DG R&I of the  
625 European Commission and Ada Health GmbH and holds stock options in Ada Health GmbH; Jakob Nikolas  
626 Kather declares consulting services for Owkin, France; DoMore Diagnostics, Norway; Panakeia, UK, and  
627 Scailyte, Switzerland; Jakob Nikolas Kather holds stocks in Kather Consulting and StratifAI GmbH and has  
628 received honoraria for lectures and advisory board participation by AstraZeneca, Bayer, Eisai, MSD, BMS, Roche,  
629 Pfizer and Fresenius. None of the other authors declares potential conflicts of interest.

### 630 **Data sharing**

631 The generated dataset, including AI-specific frameworks and legislation for 197 countries and territories, will be  
632 made publicly available under the Creative Commons Attribution 4.0 International (CC-BY-4.0) license on  
633 figshare (<https://figshare.com>) upon acceptance of the publication. The digital object identifier will be provided  
634 upon acceptance of the publication.



## 635 References

- 636 1. Sizing the prize: What's the real value of AI for your business and how can you capitalise?. Available  
637 at: <https://www.pwc.com/gx/en/issues/analytics/assets/pwc-ai-analysis-sizing-the-prize-report.pdf>  
638 (accessed December 23, 2024).
- 639 2. Rajpurkar P, Chen E, Banerjee O, Topol EJ. AI in health and medicine. *Nat Med* 2022;28:31–38.
- 640 3. Ethics and governance of artificial intelligence for health: WHO guidance. Geneva: World Health  
641 Organization; 2021. Available at: [https://iris.who.int/bitstream/handle/10665/341996/9789240029200-](https://iris.who.int/bitstream/handle/10665/341996/9789240029200-eng.pdf?sequence=1)  
642 [eng.pdf?sequence=1](https://iris.who.int/bitstream/handle/10665/341996/9789240029200-eng.pdf?sequence=1) (accessed December 23, 2024).
- 643 4. Africa Union Continental Artificial Intelligence Strategy. Available at:  
644 [https://au.int/sites/default/files/documents/44004-doc-EN-Continental\\_AI\\_Strategy\\_July\\_2024.pdf](https://au.int/sites/default/files/documents/44004-doc-EN-Continental_AI_Strategy_July_2024.pdf)  
645 (accessed December 12, 2024).
- 646 5. Seizing the opportunities of safe, secure and trustworthy artificial intelligence systems for sustainable  
647 development. Available at: <https://documents.un.org/doc/undoc/ltd/n24/065/92/pdf/n2406592.pdf>  
648 (accessed December 23, 2024).
- 649 6. Governing AI for Humanity. Available at:  
650 [https://www.un.org/sites/un2.un.org/files/governing\\_ai\\_for\\_humanity\\_final\\_report\\_en.pdf](https://www.un.org/sites/un2.un.org/files/governing_ai_for_humanity_final_report_en.pdf) (accessed  
651 December 11, 2024).
- 652 7. Assessing potential future artificial intelligence risks, benefits and policy imperatives. Available at:  
653 [https://www.oecd.org/en/publications/assessing-potential-future-artificial-intelligence-risks-benefits-](https://www.oecd.org/en/publications/assessing-potential-future-artificial-intelligence-risks-benefits-and-policy-imperatives_3f4e3dfb-en.html)  
654 [and-policy-imperatives\\_3f4e3dfb-en.html](https://www.oecd.org/en/publications/assessing-potential-future-artificial-intelligence-risks-benefits-and-policy-imperatives_3f4e3dfb-en.html) (accessed December 23, 2024).
- 655 8. Advancing accountability in AI. Available at: [https://www.oecd.org/en/publications/advancing-](https://www.oecd.org/en/publications/advancing-accountability-in-ai_2448f04b-en.html)  
656 [accountability-in-ai\\_2448f04b-en.html](https://www.oecd.org/en/publications/advancing-accountability-in-ai_2448f04b-en.html) (accessed December 12, 2024).
- 657 9. Common guideposts to promote interoperability in AI risk management. Available at:  
658 [https://www.oecd.org/en/publications/common-guideposts-to-promote-interoperability-in-ai-risk-](https://www.oecd.org/en/publications/common-guideposts-to-promote-interoperability-in-ai-risk-management_ba602d18-en.html)  
659 [management\\_ba602d18-en.html](https://www.oecd.org/en/publications/common-guideposts-to-promote-interoperability-in-ai-risk-management_ba602d18-en.html) (accessed December 8, 2024).
- 660 10. G7 Hiroshima Process on Generative Artificial Intelligence (AI). Available at:  
661 [https://www.oecd.org/en/publications/2023/09/g7-hiroshima-process-on-generative-artificial-](https://www.oecd.org/en/publications/2023/09/g7-hiroshima-process-on-generative-artificial-intelligence-ai_8d19e746.html)  
662 [intelligence-ai\\_8d19e746.html](https://www.oecd.org/en/publications/2023/09/g7-hiroshima-process-on-generative-artificial-intelligence-ai_8d19e746.html) (accessed December 12, 2024).
- 663 11. G20 AI Principles. Available at: <https://oecd.ai/en/wonk/documents/g20-ai-principles> (accessed  
664 December 1, 2024).

- 665 12. Regulation (EU) 2024/1689 of the European Parliament and of the Council of 13 June 2024 laying down  
666 harmonised rules on artificial intelligence and amending Regulations (EC) No 300/2008, (EU) No  
667 167/2013, (EU) No 168/2013, (EU) 2018/858, (EU) 2018/1139 and (EU) 2019/2144 and Directives  
668 2014/90/EU, (EU) 2016/797 and (EU) 2020/1828 (Artificial Intelligence Act) (Text with EEA  
669 relevance). Available at: <https://eur-lex.europa.eu/eli/reg/2024/1689/oj> (accessed December 11, 2024).
- 670 13. The Framework Convention on Artificial Intelligence. Available at:  
671 <https://www.coe.int/en/web/artificial-intelligence/the-framework-convention-on-artificial-intelligence>  
672 (accessed December 25, 2024).
- 673 14. Busch F, Kather JN, Johner C, et al. Navigating the European Union Artificial Intelligence Act for  
674 Healthcare. *npj Digit Med* 2024;7:210.
- 675 15. Regulation (EU) 2017/745 of the European Parliament and of the Council of 5 April 2017 on medical  
676 devices, amending Directive 2001/83/EC, Regulation (EC) No 178/2002 and Regulation (EC) No  
677 1223/2009 and repealing Council Directives 90/385/EEC and 93/42/EEC (Text with EEA relevance.)  
678 Available at: <https://eur-lex.europa.eu/legal-content/EN/TXT/?uri=CELEX%3A32017R0745> (accessed  
679 December 25, 2024).
- 680 16. Regulation (EU) 2017/746 of the European Parliament and of the Council of 5 April 2017 on in vitro  
681 diagnostic medical devices and repealing Directive 98/79/EC and Commission Decision 2010/227/EU  
682 (Text with EEA relevance.). Available at: <https://eur-lex.europa.eu/eli/reg/2017/746/oj> (accessed  
683 December 25, 2024).
- 684 17. Gilbert S. The EU passes the AI Act and its implications for digital medicine are unclear. *npj Digit Med*  
685 2024;7:135.
- 686 18. Long awaited EU AI Act becomes law after publication in the EU's Official Journal. Available at:  
687 [https://www.whitecase.com/insight-alert/long-awaited-eu-ai-act-becomes-law-after-publication-eus-](https://www.whitecase.com/insight-alert/long-awaited-eu-ai-act-becomes-law-after-publication-eus-official-journal)  
688 [official-journal](https://www.whitecase.com/insight-alert/long-awaited-eu-ai-act-becomes-law-after-publication-eus-official-journal) (accessed December 25, 2024).
- 689 19. AI regulation: a pro-innovation approach. Available at:  
690 <https://www.gov.uk/government/publications/ai-regulation-a-pro-innovation-approach> (accessed  
691 December 1, 2024).
- 692 20. Software and AI as a Medical Device Change Programme - Roadmap. Available at:  
693 <https://www.gov.uk/government/publications/software-and-ai-as-a-medical-device-change->

- 694 [programme/software-and-ai-as-a-medical-device-change-programme-roadmap#introduction](#) (accessed  
695 December 11, 2024).
- 696 21. Oral statement to Parliament: The King's Speech 2024. Available at:  
697 <https://www.gov.uk/government/speeches/the-kings-speech-2024> (accessed December 4, 2024).
- 698 22. Gilbert S, Fenech M, Hirsch M, Upadhyay S, Biasiucci A, Starlinger J. Algorithm Change Protocols in  
699 the Regulation of Adaptive Machine Learning-Based Medical Devices. *J Med Internet Res*  
700 2021;**23**:e30545.
- 701 23. Artificial Intelligence and Machine Learning (AI/ML)-Enabled Medical Devices. Available at:  
702 [https://www.fda.gov/medical-devices/software-medical-device-samd/artificial-intelligence-and-](https://www.fda.gov/medical-devices/software-medical-device-samd/artificial-intelligence-and-machine-learning-aiml-enabled-medical-devices)  
703 [machine-learning-aiml-enabled-medical-devices](https://www.fda.gov/medical-devices/software-medical-device-samd/artificial-intelligence-and-machine-learning-aiml-enabled-medical-devices) (accessed December 29, 2024).
- 704 24. Clinical Decision Support Software. Available at: [https://www.fda.gov/regulatory-information/search-](https://www.fda.gov/regulatory-information/search-fda-guidance-documents/clinical-decision-support-software)  
705 [fda-guidance-documents/clinical-decision-support-software](https://www.fda.gov/regulatory-information/search-fda-guidance-documents/clinical-decision-support-software) (accessed December 29, 2024).
- 706 25. Health Data, Technology, and Interoperability: Certification Program Updates, Algorithm Transparency,  
707 and Information Sharing (HTI-1) Final Rule. Available at: [https://www.healthit.gov/topic/laws-](https://www.healthit.gov/topic/laws-regulation-and-policy/health-data-technology-and-interoperability-certification-program)  
708 [regulation-and-policy/health-data-technology-and-interoperability-certification-program](https://www.healthit.gov/topic/laws-regulation-and-policy/health-data-technology-and-interoperability-certification-program) (accessed  
709 December 29, 2024).
- 710 26. Executive Order on the Safe, Secure, and Trustworthy Development and Use of Artificial Intelligence.  
711 Available at: [https://www.whitehouse.gov/briefing-room/presidential-actions/2023/10/30/executive-](https://www.whitehouse.gov/briefing-room/presidential-actions/2023/10/30/executive-order-on-the-safe-secure-and-trustworthy-development-and-use-of-artificial-intelligence/)  
712 [order-on-the-safe-secure-and-trustworthy-development-and-use-of-artificial-intelligence/](https://www.whitehouse.gov/briefing-room/presidential-actions/2023/10/30/executive-order-on-the-safe-secure-and-trustworthy-development-and-use-of-artificial-intelligence/) (accessed  
713 December 4, 2024).
- 714 27. HHS Artificial Intelligence (AI) Strategy. Available at: [https://www.hhs.gov/programs/topic-](https://www.hhs.gov/programs/topic-sites/ai/strategy/index.html)  
715 [sites/ai/strategy/index.html](https://www.hhs.gov/programs/topic-sites/ai/strategy/index.html) (accessed December 4, 2024).
- 716 28. Summary: H.R.6216 - National Artificial Intelligence Initiative Act of 2020. Available at:  
717 <https://www.govtrack.us/congress/bills/116/hr6216/summary> (accessed December 4, 2024).
- 718 29. SB 1047: Safe and Secure Innovation for Frontier Artificial Intelligence Models Act. Available at:  
719 [https://digitaldemocracy.calmatters.org/bills/ca\\_202320240sb1047](https://digitaldemocracy.calmatters.org/bills/ca_202320240sb1047) (accessed December 21, 2024).
- 720 30. S.3572 - Algorithmic Accountability Act of 2022. Available at: [https://www.congress.gov/bill/117th-](https://www.congress.gov/bill/117th-congress/senate-bill/3572#:~:text=Introduced%20in%20Senate%20(02%2F03%2F2022)&text=This%20bill%20require)  
721 [congress/senate-](https://www.congress.gov/bill/117th-congress/senate-bill/3572#:~:text=Introduced%20in%20Senate%20(02%2F03%2F2022)&text=This%20bill%20require)  
722 [bill/3572#:~:text=Introduced%20in%20Senate%20\(02%2F03%2F2022\)&text=This%20bill%20require](https://www.congress.gov/bill/117th-congress/senate-bill/3572#:~:text=Introduced%20in%20Senate%20(02%2F03%2F2022)&text=This%20bill%20require)

- 723 [s%20certain%20businesses,of%20those%20systems%20on%20consumers](#). (accessed December 21,  
724 2024).
- 725 31. Marketing Submission Recommendations for a Predetermined Change Control Plan for Artificial  
726 Intelligence-Enabled Device Software Functions. Available at: [https://www.fda.gov/regulatory-](https://www.fda.gov/regulatory-information/search-fda-guidance-documents/marketing-submission-recommendations-predetermined-change-control-plan-artificial-intelligence)  
727 [information/search-fda-guidance-documents/marketing-submission-recommendations-predetermined-](https://www.fda.gov/regulatory-information/search-fda-guidance-documents/marketing-submission-recommendations-predetermined-change-control-plan-artificial-intelligence)  
728 [change-control-plan-artificial-intelligence](https://www.fda.gov/regulatory-information/search-fda-guidance-documents/marketing-submission-recommendations-predetermined-change-control-plan-artificial-intelligence) (accessed December 29, 2024).
- 729 32. C-27. An Act to enact the Consumer Privacy Protection Act, the Personal Information and Data  
730 Protection Tribunal Act and the Artificial Intelligence and Data Act and to make consequential and  
731 related amendments to other Acts. Available at: <https://www.parl.ca/legisinfo/en/bill/44-1/c-27>  
732 (accessed December 21, 2024).
- 733 33. Guide on the use of generative artificial intelligence. Available at:  
734 [https://www.canada.ca/en/government/system/digital-government/digital-government-](https://www.canada.ca/en/government/system/digital-government/digital-government-innovations/responsible-use-ai/guide-use-generative-ai.html)  
735 [innovations/responsible-use-ai/guide-use-generative-ai.html](https://www.canada.ca/en/government/system/digital-government/digital-government-innovations/responsible-use-ai/guide-use-generative-ai.html) (accessed December 21, 2024).
- 736 34. Good Machine Learning Practice for Medical Device Development: Guiding Principles. Available at:  
737 [https://www.canada.ca/en/health-canada/services/drugs-health-products/medical-devices/good-](https://www.canada.ca/en/health-canada/services/drugs-health-products/medical-devices/good-machine-learning-practice-medical-device-development.html)  
738 [machine-learning-practice-medical-device-development.html](https://www.canada.ca/en/health-canada/services/drugs-health-products/medical-devices/good-machine-learning-practice-medical-device-development.html) (accessed December 21, 2024).
- 739 35. Transparency for Machine Learning-Enabled Medical Devices: Guiding Principles. Available at:  
740 [https://www.canada.ca/en/health-canada/services/drugs-health-products/medical-devices/transparency-](https://www.canada.ca/en/health-canada/services/drugs-health-products/medical-devices/transparency-machine-learning-guiding-principles.html)  
741 [machine-learning-guiding-principles.html](https://www.canada.ca/en/health-canada/services/drugs-health-products/medical-devices/transparency-machine-learning-guiding-principles.html) (accessed December 21, 2024).
- 742 36. Digital Health Laws and Regulations: Mexico. Available from: [https://iclg.com/practice-areas/digital-](https://iclg.com/practice-areas/digital-health-laws-and-regulations/mexico)  
743 [health-laws-and-regulations/mexico](https://iclg.com/practice-areas/digital-health-laws-and-regulations/mexico) (accessed December 21, 2024).
- 744 37. Ley General de Salud (General Health Act). Available at: <https://extranet.who.int/mindbank/item/2564>  
745 (accessed December 21, 2024).
- 746 38. Data Protection in Mexico: Federal Law for the Protection of Personal Data Held by Private Parties  
747 (FLPPDHPP). Available at: [https://intellectual-property-helpdesk.ec.europa.eu/news-events/news/data-](https://intellectual-property-helpdesk.ec.europa.eu/news-events/news/data-protection-mexico-federal-law-protection-personal-data-held-private-parties-flppdhpp-2024-07-03_en)  
748 [protection-mexico-federal-law-protection-personal-data-held-private-parties-flppdhpp-2024-07-03\\_en](https://intellectual-property-helpdesk.ec.europa.eu/news-events/news/data-protection-mexico-federal-law-protection-personal-data-held-private-parties-flppdhpp-2024-07-03_en)  
749 (accessed December 21, 2024).
- 750 39. Mexico: Introduced Federal Law Regulating Artificial Intelligence, including AI authority governance.  
751 Available at: [https://digitalpolicyalert.org/event/18794-introduced-federal-law-regulating-artificial-](https://digitalpolicyalert.org/event/18794-introduced-federal-law-regulating-artificial-intelligence-including-ai-authority-governance)  
752 [intelligence-including-ai-authority-governance](https://digitalpolicyalert.org/event/18794-introduced-federal-law-regulating-artificial-intelligence-including-ai-authority-governance) (accessed December 20, 2024).

- 753 40. Costa Rica is the First Country in Central America to Have a National Artificial Intelligence Strategy.  
754 Available at: <https://thecostaricanews.com/costa-rica-is-the-first-country-in-central-america-to->  
755 [have-a-national-artificial-intelligence-strategy/](https://thecostaricanews.com/costa-rica-is-the-first-country-in-central-america-to-have-a-national-artificial-intelligence-strategy/) (accessed December 20, 2024).
- 756 41. DR ranks 7th of 33 Latin American and Caribbean countries in AI Readiness Index. Available at:  
757 <https://dr1.com/news/2024/02/07/dr-ranks-7th-of-33-latin-american-and-caribbean-countries-in-ai->  
758 [readiness-index/](https://dr1.com/news/2024/02/07/dr-ranks-7th-of-33-latin-american-and-caribbean-countries-in-ai-readiness-index/) (accessed December 20, 2024).
- 759 42. UNESCO Caribbean AI Policy Roadmap. Available at: <https://ai4caribbean.com/wp->  
760 [content/uploads/2024/08/Caribbean-Artificial-Intelligence-Policy-Roadmap-compressed.pdf](https://ai4caribbean.com/wp-content/uploads/2024/08/Caribbean-Artificial-Intelligence-Policy-Roadmap-compressed.pdf) (accessed  
761 December 21, 2024).
- 762 43. Signed Cartagena de Indias Declaration for Governance, the construction of AI ecosystems and the  
763 promotion of AI education in an Ethical and Responsible manner in Latin America and the Caribbean.  
764 Available at: <https://digitalpolicyalert.org/event/22018-signed-cartagena-de-indias-declaration-for->  
765 [governance-the-construction-of-ai-ecosystems-and-the-promotion-of-ai-education-in-an-ethical-and-](https://digitalpolicyalert.org/event/22018-signed-cartagena-de-indias-declaration-for-governance-the-construction-of-ai-ecosystems-and-the-promotion-of-ai-education-in-an-ethical-and-)  
766 [responsible-manner-in-latin-america-and-the-caribbean](https://digitalpolicyalert.org/event/22018-signed-cartagena-de-indias-declaration-for-governance-the-construction-of-ai-ecosystems-and-the-promotion-of-ai-education-in-an-ethical-and-responsible-manner-in-latin-america-and-the-caribbean) (accessed December 20, 2024).
- 767 44. Brazilian Artificial Intelligence Strategy. Available at: <https://www.gov.br/mcti/pt-br/acompanhe-o->  
768 [mcti/transformacaodigital/inteligencia-artificial](https://www.gov.br/mcti/pt-br/acompanhe-o-mcti/transformacaodigital/inteligencia-artificial) (accessed December 20, 2024).
- 769 45. Projeto de Lei nº 2338, de 2023. Available at: <https://www25.senado.leg.br/web/atividade/materias/->  
770 [/materia/157233](https://www25.senado.leg.br/web/atividade/materias/-materia/157233) (accessed December 20, 2024).
- 771 46. ANVISA Regulatory Standards. Available at:  
772 [https://anvisalegis.datalegis.net/action/ActionDatalegis.php?acao=categorias&cod\\_modulo=310&menu](https://anvisalegis.datalegis.net/action/ActionDatalegis.php?acao=categorias&cod_modulo=310&menu)  
773 [Open=true](https://anvisalegis.datalegis.net/action/ActionDatalegis.php?acao=categorias&cod_modulo=310&menuOpen=true) (accessed December 20, 2024).
- 774 47. Peru: Council of Ministers publishes draft AI Regulation. Available at:  
775 <https://www.dataguidance.com/news/peru-council-ministers-publishes-draft-ai-regulation> (accessed  
776 December 20, 2024).
- 777 48. Adopted Digital Trust framework (DU 007-2020). Available at:  
778 <https://digitalpolicyalert.org/event/4168-adopted-digital-trust-framework-du-007-2020> (accessed  
779 December 20, 2024).
- 780 49. Política Nacional de Inteligencia Artificial. Available at:  
781 [https://www.minciencia.gob.cl/uploads/filer\\_public/bc/38/bc389daf-4514-4306-867c-](https://www.minciencia.gob.cl/uploads/filer_public/bc/38/bc389daf-4514-4306-867c-)  
782 [760ae7686e2c/documento\\_politica\\_ia\\_digital\\_.pdf](https://www.minciencia.gob.cl/uploads/filer_public/bc/38/bc389daf-4514-4306-867c-760ae7686e2c/documento_politica_ia_digital_.pdf) (accessed December 21, 2024).

- 783 50. Regula los sistemas de inteligencia artificial. Available at:  
784 <https://www.camara.cl/legislacion/ProyectosDeLey/tramitacion.aspx?prmID=17429&prmBOLETIN=1>  
785 [6821-](https://www.camara.cl/legislacion/ProyectosDeLey/tramitacion.aspx?prmID=17429&prmBOLETIN=1)  
786 [19https://www.camara.cl/legislacion/ProyectosDeLey/tramitacion.aspx?prmID=17429&prmBOLETIN](https://www.camara.cl/legislacion/ProyectosDeLey/tramitacion.aspx?prmID=17429&prmBOLETIN)  
787 [=16821-19](https://www.camara.cl/legislacion/ProyectosDeLey/tramitacion.aspx?prmID=17429&prmBOLETIN) (accessed December 21, 2024).
- 788 51. Medical device regulatory environment: Peru, Chile, Ecuador, Costa Rica, Panama, Colombia, Paraguay,  
789 El Salvador, Uruguay, Bolivia. Available at: [https://mdrc-consulting.com/latam-medical-device-](https://mdrc-consulting.com/latam-medical-device-regulatory-environment/)  
790 [regulatory-environment/](https://mdrc-consulting.com/latam-medical-device-regulatory-environment/) (accessed December 21, 2024).
- 791 52. Plan Nacional de Inteligencia Artificial. Available at: [https://oecd-opsi.org/wp-](https://oecd-opsi.org/wp-content/uploads/2021/02/Argentina-National-AI-Strategy.pdf)  
792 [content/uploads/2021/02/Argentina-National-AI-Strategy.pdf](https://oecd-opsi.org/wp-content/uploads/2021/02/Argentina-National-AI-Strategy.pdf) (accessed December 21, 2024).
- 793 53. Applicable Legal Regime for the Responsible Use of Artificial Intelligence in the Argentine Republic.  
794 Available at: [https://www4.hcdn.gob.ar/dependencias/dsecretaria/Periodo2024/PDF2024/TP2024/3003-](https://www4.hcdn.gob.ar/dependencias/dsecretaria/Periodo2024/PDF2024/TP2024/3003-D-2024.pdf)  
795 [D-2024.pdf](https://www4.hcdn.gob.ar/dependencias/dsecretaria/Periodo2024/PDF2024/TP2024/3003-D-2024.pdf) (accessed December 18, 2024).
- 796 54. ANMAT Argentina Medical Device Registration. Available at:  
797 <https://pureglobal.com/markets/argentina> (accessed December 18, 2024).
- 798 55. Estrategia Nacional Digital de Colombia 2023-2026. Available at:  
799 [https://www.mintic.gov.co/portal/715/articles-334120\\_recurso\\_1.pdf](https://www.mintic.gov.co/portal/715/articles-334120_recurso_1.pdf) (accessed December 18, 2024).
- 800 56. Colombia: Passed Law (059/23) on Public Policy Guidelines for AI including AI Authority. Available  
801 at: [https://digitalpolicyalert.org/event/17926-passed-law-05923-on-public-policy-guidelines-for-ai-](https://digitalpolicyalert.org/event/17926-passed-law-05923-on-public-policy-guidelines-for-ai-including-ai-authority)  
802 [including-ai-authority](https://digitalpolicyalert.org/event/17926-passed-law-05923-on-public-policy-guidelines-for-ai-including-ai-authority) (accessed December 18, 2024).
- 803 57. Presentation of the draft Organic Law for the Regulation and Promotion of Artificial Intelligence in  
804 Ecuador. Available at:  
805 [https://ppless.asambleanacional.gob.ec/alfresco/d/d/workspace/SpacesStore/474d299c-7ac6-4b11-9bf0-](https://ppless.asambleanacional.gob.ec/alfresco/d/d/workspace/SpacesStore/474d299c-7ac6-4b11-9bf0-097a0c9c75cb/pp%20-%20proyecto%20de%20ley%20450889-nu%F1ez.pdf)  
806 [097a0c9c75cb/pp%20-%20proyecto%20de%20ley%20450889-nu%F1ez.pdf](https://ppless.asambleanacional.gob.ec/alfresco/d/d/workspace/SpacesStore/474d299c-7ac6-4b11-9bf0-097a0c9c75cb/pp%20-%20proyecto%20de%20ley%20450889-nu%F1ez.pdf) (accessed December 20,  
807 2024).
- 808 58. Digital Transformation Center Ecuador. Available at: [https://www.bmz-](https://www.bmz-digital.global/en/digitalzentrum-ecuador/#:~:text=In%20August%202022%2C%20the%20Ecuadorian,%2C%20cybersecurity%2C%20and%20government%20modernization)  
809 [digital.global/en/digitalzentrum-](https://www.bmz-digital.global/en/digitalzentrum-ecuador/#:~:text=In%20August%202022%2C%20the%20Ecuadorian,%2C%20cybersecurity%2C%20and%20government%20modernization)  
810 [ecuador/#:~:text=In%20August%202022%2C%20the%20Ecuadorian,%2C%20cybersecurity%2C%20](https://www.bmz-digital.global/en/digitalzentrum-ecuador/#:~:text=In%20August%202022%2C%20the%20Ecuadorian,%2C%20cybersecurity%2C%20and%20government%20modernization)  
811 [and%20government%20modernization](https://www.bmz-digital.global/en/digitalzentrum-ecuador/#:~:text=In%20August%202022%2C%20the%20Ecuadorian,%2C%20cybersecurity%2C%20and%20government%20modernization) (accessed December 20, 2024).

- 812 59. Committee on Artificial Intelligence. Available at:  
813 <https://observatorioecuadordigital.mintel.gob.ec/acerca-comite-ia/> (accessed December 20, 2024).
- 814 60. Public Consultation on the National Artificial Intelligence Strategy. Available at:  
815 <https://plataformaparticipacionciudadana.gub.uy/processes/consulta-publica-estrategia-ia> (accessed  
816 December 20, 2024).
- 817 61. Announcement on the Release of Guidelines for the Classification and Definition of Artificial  
818 Intelligence Medical Software Products (No. 47, 2021). Available at:  
819 <https://www.nmpa.gov.cn/xxgk/gtg/ylqxggtg/ylqxqtggtg/20210715165810118.html> (accessed  
820 December 25, 2024).
- 821 62. Announcement on the Release of Six Guiding Principles Including the Guidelines for the Generic  
822 Naming of Medical Rehabilitation Devices (No. 48, 2021). Available at:  
823 <https://www.nmpa.gov.cn/xxgk/gtg/ylqxggtg/ylqxqtggtg/20210715165810118.html> (accessed  
824 December 25, 2024).
- 825 63. Announcement on the Release of Guidelines for the Registration Review of Artificial Intelligence  
826 Medical Devices (No. 8, 2022). Available at:  
827 <https://www.cmde.org.cn/xwdt/shpgzgg/gztg/20220309090800158.html> (accessed December 25,  
828 2024).
- 829 64. Announcement on the Release of Guidelines for the Registration Review of Medical Device Software  
830 (Revised Version 2022) (No. 9, 2022). Available at:  
831 <https://www.cmde.org.cn/xwdt/shpgzgg/gztg/20220309091454609.html> (accessed December 25,  
832 2024).
- 833 65. Announcement on the Release of Guidelines for the Registration Review of Medical Device  
834 Cybersecurity (Revised Version 2022) (No. 7, 2022). Available at:  
835 <https://www.cmde.org.cn/xwdt/shpgzgg/gztg/20220309085600367.html> (accessed December 25,  
836 2024).
- 837 66. Announcement on the Release of Guidelines for the Registration Review of CT Image Auxiliary  
838 Detection Software for Pulmonary Nodules (No. 21, 2022). Available at:  
839 <https://www.cmde.org.cn/xwdt/shpgzgg/gztg/20220526102356105.html> (accessed December 25,  
840 2024).

- 841 67. Announcement on the Release of Guidelines for the Registration Review of Fundus Image Auxiliary  
842 Diagnostic Software for Diabetic Retinopathy (No. 23, 2022). Available at:  
843 <https://www.cmde.org.cn/xwdt/shpgzgg/gztg/20220602103048151.html> (accessed December 25,  
844 2024).
- 845 68. Interim Measures for the Management of Generative Artificial Intelligence Services. (2022, July 10).  
846 Available at: [https://www.gov.cn/zhengce/zhengceku/202307/content\\_6891752.htm](https://www.gov.cn/zhengce/zhengceku/202307/content_6891752.htm) (accessed  
847 December 25, 2024).
- 848 69. Artificial Intelligence Law of the People’s Republic of China (Draft for Suggestions from Scholars).  
849 Available at: <https://cset.georgetown.edu/publication/china-ai-law-draft/> (accessed December 25, 2024).
- 850 70. China Consults on the Overarching Regulation of Medical Devices. Available at:  
851 [https://baipharm.chemlinked.com/news/china-consults-on-the-overarching-regulation-of-medical-](https://baipharm.chemlinked.com/news/china-consults-on-the-overarching-regulation-of-medical-devices)  
852 [devices](https://baipharm.chemlinked.com/news/china-consults-on-the-overarching-regulation-of-medical-devices) (accessed December 24, 2024).
- 853 71. Draft AI R&D GUIDELINES for International Discussions. Available at:  
854 [https://www.soumu.go.jp/main\\_content/000507517.pdf](https://www.soumu.go.jp/main_content/000507517.pdf) (accessed December 24, 2024).
- 855 72. AI Utilization Guidelines. Available at: [https://www.soumu.go.jp/main\\_content/000658284.pdf](https://www.soumu.go.jp/main_content/000658284.pdf)  
856 (accessed December 27, 2024).
- 857 73. Governance Guidelines for Implementation of AI Principles Ver. 1.1. Available at:  
858 [https://www.meti.go.jp/shingikai/mono\\_info\\_service/ai\\_shakai\\_jisso/pdf/20220128\\_2.pdf](https://www.meti.go.jp/shingikai/mono_info_service/ai_shakai_jisso/pdf/20220128_2.pdf) (accessed  
859 December 27, 2024).
- 860 74. AI Guidelines for Business Ver1.0. Available at: [https://www.soumu.go.jp/main\\_content/000943087.pdf](https://www.soumu.go.jp/main_content/000943087.pdf)  
861 (accessed December 27, 2024).
- 862 75. Tentative Summary of AI Issues. Available at: [https://www8.cao.go.jp/cstp/ai/ronten\\_youshi\\_yaku.pdf](https://www8.cao.go.jp/cstp/ai/ronten_youshi_yaku.pdf)  
863 (accessed December 27, 2024).
- 864 76. Overview of the Basic Law for the Promotion of Responsible AI. Available at:  
865 <https://note.com/api/v2/attachments/download/006badec3e4d847b3a0c92358b2de63a> (accessed  
866 December 27, 2024).
- 867 77. National Strategy for Artificial Intelligence. Available at:  
868 <https://www.msit.go.kr/bbs/view.do?sCode=eng&nttSeqNo=9&bbsSeqNo=46&mId=10&mPid=9>  
869 (accessed December 27, 2024).



- 870 78. The Digital New Deal Is to Lead Digital Transition in the World After COVID-19 (July 15). Available  
871 at:  
872 [https://www.msit.go.kr/eng/bbs/view.do?sCode=eng&mId=4&mPid=2&pageIndex=&bbsSeqNo=42&](https://www.msit.go.kr/eng/bbs/view.do?sCode=eng&mId=4&mPid=2&pageIndex=&bbsSeqNo=42&nttSeqNo=443&searchOpt=&searchTxt=)  
873 [nttSeqNo=443&searchOpt=&searchTxt=](https://www.msit.go.kr/eng/bbs/view.do?sCode=eng&mId=4&mPid=2&pageIndex=&bbsSeqNo=42&nttSeqNo=443&searchOpt=&searchTxt=) (accessed December 21, 2024).
- 874 79. Seoul Declaration for Safe, Innovative and Inclusive AI by Participants Attending the Leaders' Session  
875 of the AI Seoul Summit, 21st May 2024. Available at: <https://eng.president.go.kr/briefing/Eum2BbS4>  
876 (accessed December 21, 2024).
- 877 80. Latest Legislative Trends in Korea Regarding AI. Available at:  
878 [https://www.legal500.com/developments/thought-leadership/latest-legislative-trends-in-korea-](https://www.legal500.com/developments/thought-leadership/latest-legislative-trends-in-korea-regarding-ai/)  
879 [regarding-ai/](https://www.legal500.com/developments/thought-leadership/latest-legislative-trends-in-korea-regarding-ai/) (accessed December 21, 2024).
- 880 81. Comprehensive Revision of the Personal Information Protection Act in 2023: What Has Changed?  
881 Available at:  
882 [https://www.pipc.go.kr/np/cop/bbs/selectBoardArticle.do?bbsId=BS074&mCode=C020010000&nttId=](https://www.pipc.go.kr/np/cop/bbs/selectBoardArticle.do?bbsId=BS074&mCode=C020010000&nttId=9819#LINK)  
883 [9819#LINK](https://www.pipc.go.kr/np/cop/bbs/selectBoardArticle.do?bbsId=BS074&mCode=C020010000&nttId=9819#LINK) (accessed December 22, 2024).
- 884 82. [2206772] Basic Law on the Development of Artificial Intelligence and Creation of Trust Base  
885 (Alternative) (Chairman of the Science, Technology, Information, Broadcasting and Communications  
886 Committee). Available at:  
887 [https://likms.assembly.go.kr/bill/billDetail.do?billId=PRC\\_R2V4H1W1T2K5M1O6E4Q9T0V7Q9S0U](https://likms.assembly.go.kr/bill/billDetail.do?billId=PRC_R2V4H1W1T2K5M1O6E4Q9T0V7Q9S0U0)  
888 [0](https://likms.assembly.go.kr/bill/billDetail.do?billId=PRC_R2V4H1W1T2K5M1O6E4Q9T0V7Q9S0U0) (accessed December 22, 2024).
- 889 83. South Korea Unveils Unified AI Act. Available at: <https://babl.ai/south-korea-unveils-unified-ai-act/>  
890 (accessed December 22, 2024).
- 891 84. Launch of Korea's First 'AI Safety Research Institute'...'AI Safety Research Hub'. Available at:  
892 [https://smartcity.go.kr/en/2024/11/27/%EA%B5%AD%EB%82%B4-%EC%B2%AB-ai-](https://smartcity.go.kr/en/2024/11/27/%EA%B5%AD%EB%82%B4-%EC%B2%AB-ai-%EC%95%88%EC%A0%84%EC%97%B0%EA%B5%AC%EC%86%8C-%EC%B6%9C%EB%B2%94%C2%B7%C2%B7%ai-%EC%95%88%EC%A0%84-%EC%97%B0%EA%B5%AC-%ED%97%88%EB%B8%8C%EB%A1%9C/)  
893 [%EC%95%88%EC%A0%84%EC%97%B0%EA%B5%AC%EC%86%8C-](https://smartcity.go.kr/en/2024/11/27/%EA%B5%AD%EB%82%B4-%EC%B2%AB-ai-%EC%95%88%EC%A0%84%EC%97%B0%EA%B5%AC%EC%86%8C-%EC%B6%9C%EB%B2%94%C2%B7%C2%B7%ai-%EC%95%88%EC%A0%84-%EC%97%B0%EA%B5%AC-%ED%97%88%EB%B8%8C%EB%A1%9C/)  
894 [%EC%B6%9C%EB%B2%94%C2%B7%C2%B7%ai-%EC%95%88%EC%A0%84-](https://smartcity.go.kr/en/2024/11/27/%EA%B5%AD%EB%82%B4-%EC%B2%AB-ai-%EC%95%88%EC%A0%84-%EC%97%B0%EA%B5%AC-%ED%97%88%EB%B8%8C%EB%A1%9C/)  
895 [%EC%97%B0%EA%B5%AC-%ED%97%88%EB%B8%8C%EB%A1%9C/](https://smartcity.go.kr/en/2024/11/27/%EA%B5%AD%EB%82%B4-%EC%B2%AB-ai-%EC%95%88%EC%A0%84-%EC%97%B0%EA%B5%AC-%ED%97%88%EB%B8%8C%EB%A1%9C/) (accessed December 22,  
896 2024).
- 897 85. National Artificial Intelligence Policy. Available at:  
898 [https://moitt.gov.pk/SiteImage/Misc/files/National%20AI%20Policy%20Consultation%20Draft%20V1](https://moitt.gov.pk/SiteImage/Misc/files/National%20AI%20Policy%20Consultation%20Draft%20V1.pdf)  
899 [.pdf](https://moitt.gov.pk/SiteImage/Misc/files/National%20AI%20Policy%20Consultation%20Draft%20V1.pdf) (accessed December 18, 2024).

- 900 86. Proposed Digital India Act, 2023. Available at:  
901 [https://www.meity.gov.in/writereaddata/files/DIA\\_Presentation%2009.03.2023%20Final.pdf](https://www.meity.gov.in/writereaddata/files/DIA_Presentation%2009.03.2023%20Final.pdf) (accessed  
902 December 18, 2024).
- 903 87. The Information Technology Act, 2000. Available at:  
904 [https://eprocure.gov.in/cppp/rulesandprocs/kbadqkdleswfdelrqehwuxcfmijmuixngudufgbuubgubfugb  
ububjxcgfvvsbdihbgfGhdFgFHtyyhRtMjk4NzY](https://eprocure.gov.in/cppp/rulesandprocs/kbadqkdleswfdelrqehwuxcfmijmuixngudufgbuubgubfugb<br/>905 ububjxcgfvvsbdihbgfGhdFgFHtyyhRtMjk4NzY) (accessed December 18, 2024).
- 906 88. National Strategy for Artificial Intelligence Bangladesh. Available at:  
907 [https://ictd.portal.gov.bd/sites/default/files/files/ictd.portal.gov.bd/page/6c9773a2\\_7556\\_4395\\_bbec\\_fl  
32b9d819f0/Draft%20-  
%20Mastering%20National%20Strategy%20for%20Artificial%20Intelligence%20-%20Bangladesh.pdf](https://ictd.portal.gov.bd/sites/default/files/files/ictd.portal.gov.bd/page/6c9773a2_7556_4395_bbec_fl<br/>908 32b9d819f0/Draft%20-<br/>909 %20Mastering%20National%20Strategy%20for%20Artificial%20Intelligence%20-%20Bangladesh.pdf)  
910 (accessed December 18, 2024).
- 911 89. Concept Paper Report on the Use and Practice of Artificial Intelligence (AI) in Nepal. Available at:  
912 <https://mocit.gov.np/content/12663/12663-nepal/> (accessed December 18, 2024).
- 913 90. Artificial Intelligence in Sri Lanka. Available at:  
914 [https://mot.gov.lk/assets/files/AI%20White%20Paper%20March%202024-  
c09aa49f7990358ad1442103b804511d.pdf](https://mot.gov.lk/assets/files/AI%20White%20Paper%20March%202024-<br/>915 c09aa49f7990358ad1442103b804511d.pdf) (accessed December 18, 2024).
- 916 91. Maldives to develop AI masterplan following Cabinet decision. Available at: <https://avas.mv/en/145048>  
917 (accessed December 18, 2024).
- 918 92. ASEAN Guide on AI Governance and Ethics. Available at: [https://asean.org/wp-  
content/uploads/2024/02/ASEAN-Guide-on-AI-Governance-and-Ethics\\_beautified\\_201223\\_v2.pdf](https://asean.org/wp-<br/>919 content/uploads/2024/02/ASEAN-Guide-on-AI-Governance-and-Ethics_beautified_201223_v2.pdf)  
920 (accessed December 18, 2024).
- 921 93. Model AI Governance Framework Second Edition. Available at: [https://www.pdpc.gov.sg/-  
/media/files/pdpc/pdf-files/resource-for-organisation/ai/sgmodelaigovframework2.pdf](https://www.pdpc.gov.sg/-<br/>922 /media/files/pdpc/pdf-files/resource-for-organisation/ai/sgmodelaigovframework2.pdf) (accessed  
923 December 19, 2024).
- 924 94. What is AI Verify? Available at: <https://aiverifyfoundation.sg/what-is-ai-verify/> (accessed December  
925 19, 2024).
- 926 95. NAIS 2.0 Singapore National AI Strategy. Available at: <https://file.go.gov.sg/nais2023.pdf> (accessed  
927 December 19, 2024).

- 928 96. Model AI Governance Framework for Generative AI. Available at: [https://aiverifyfoundation.sg/wp-](https://aiverifyfoundation.sg/wp-content/uploads/2024/05/Model-AI-Governance-Framework-for-Generative-AI-May-2024-1-1.pdf)  
929 [content/uploads/2024/05/Model-AI-Governance-Framework-for-Generative-AI-May-2024-1-1.pdf](https://aiverifyfoundation.sg/wp-content/uploads/2024/05/Model-AI-Governance-Framework-for-Generative-AI-May-2024-1-1.pdf)  
930 (accessed December 19, 2024).
- 931 97. Law concerning Electronic Information and Transactions. Available at:  
932 [http://www.flevin.com/id/lgsso/translations/JICA%20Mirror/english/4846\\_UU\\_11\\_2008\\_e.html](http://www.flevin.com/id/lgsso/translations/JICA%20Mirror/english/4846_UU_11_2008_e.html)  
933 (accessed December 19, 2024).
- 934 98. Regulation of Artificial Intelligence in Indonesia. Available at: [https://ssek.com/blog/indonesia-law-](https://ssek.com/blog/indonesia-law-update-regulation-of-artificial-intelligence/)  
935 [update-regulation-of-artificial-intelligence/](https://ssek.com/blog/indonesia-law-update-regulation-of-artificial-intelligence/) (accessed December 19, 2024).
- 936 99. The Indonesian National Strategy on Artificial Intelligence. Available at: [https://dig.watch/resource/the-](https://dig.watch/resource/the-indonesian-national-strategy-on-artificial-intelligence)  
937 [indonesian-national-strategy-on-artificial-intelligence](https://dig.watch/resource/the-indonesian-national-strategy-on-artificial-intelligence) (accessed December 19, 2024).
- 938 100. Ethical Guidelines on Use of Artificial Intelligence (AI) in Indonesia. Available at:  
939 <https://www.lexology.com/library/detail.aspx?g=9b01fed9-6722-4651-9c2c-4b707e7b3443> (accessed  
940 December 19, 2024).
- 941 101. New AI Regulation in Indonesia Aims to Address Ethical Use and Data Security. Available at:  
942 [https://jakartaglobe.id/tech/new-ai-regulation-in-indonesia-aims-to-address-ethical-use-and-data-](https://jakartaglobe.id/tech/new-ai-regulation-in-indonesia-aims-to-address-ethical-use-and-data-security)  
943 [security](https://jakartaglobe.id/tech/new-ai-regulation-in-indonesia-aims-to-address-ethical-use-and-data-security) (accessed December 20, 2024).
- 944 102. Published Draft Royal Decree on Business Operations that Use Artificial Intelligence Systems. Available  
945 at: [https://digitalpolicyalert.org/event/23250-published-draft-royal-decree-on-business-operations-that-](https://digitalpolicyalert.org/event/23250-published-draft-royal-decree-on-business-operations-that-use-artificial-intelligence-systems)  
946 [use-artificial-intelligence-systems](https://digitalpolicyalert.org/event/23250-published-draft-royal-decree-on-business-operations-that-use-artificial-intelligence-systems) (accessed December 19, 2024).
- 947 103. Closed consultation on Draft Artificial Intelligence Promotion and Support Act. Available at:  
948 [https://digitalpolicyalert.org/event/23124-closed-consultation-on-draft-artificial-intelligence-](https://digitalpolicyalert.org/event/23124-closed-consultation-on-draft-artificial-intelligence-promotion-and-support-act)  
949 [promotion-and-support-act](https://digitalpolicyalert.org/event/23124-closed-consultation-on-draft-artificial-intelligence-promotion-and-support-act) (accessed December 19, 2024).
- 950 104. Digital Thailand AI Ethics Principle and Guideline. Available at:  
951 [https://www.eta.or.th/getattachment/9d370f25-f37a-4b7c-b661-48d2d730651d/Digital-Thailand-AI-](https://www.eta.or.th/getattachment/9d370f25-f37a-4b7c-b661-48d2d730651d/Digital-Thailand-AI-Ethics-Principle-and-Guideline.pdf.aspx?lang=th-TH)  
952 [Ethics-Principle-and-Guideline.pdf.aspx?lang=th-TH](https://www.eta.or.th/getattachment/9d370f25-f37a-4b7c-b661-48d2d730651d/Digital-Thailand-AI-Ethics-Principle-and-Guideline.pdf.aspx?lang=th-TH) (accessed December 19, 2024).
- 953 105. Thailand's AI Governance Guideline. Available at: [https://www.eta.or.th/getattachment/Our-](https://www.eta.or.th/getattachment/Our-Service/AIGC/Research-and-Recommendation/Thailand%E2%80%99s-AI-Governance-Guideline-for-Executive_2023.pdf.aspx?lang=th-TH)  
954 [Service/AIGC/Research-and-Recommendation/Thailand%E2%80%99s-AI-Governance-Guideline-for-](https://www.eta.or.th/getattachment/Our-Service/AIGC/Research-and-Recommendation/Thailand%E2%80%99s-AI-Governance-Guideline-for-Executive_2023.pdf.aspx?lang=th-TH)  
955 [Executive\\_2023.pdf.aspx?lang=th-TH](https://www.eta.or.th/getattachment/Our-Service/AIGC/Research-and-Recommendation/Thailand%E2%80%99s-AI-Governance-Guideline-for-Executive_2023.pdf.aspx?lang=th-TH) (accessed December 23, 2024).
- 956 106. Vietnam to boost digital tech sector with new law. Available at: [https://english.mic.gov.vn/vietnam-to-](https://english.mic.gov.vn/vietnam-to-boost-digital-tech-sector-with-new-law-197241009094847011.htm)  
957 [boost-digital-tech-sector-with-new-law-197241009094847011.htm](https://english.mic.gov.vn/vietnam-to-boost-digital-tech-sector-with-new-law-197241009094847011.htm) (accessed December 23, 2024).

- 958 107. Malaysia National Artificial Intelligence Roadmap 2021-2025. Available at:  
959 <https://mastic.mosti.gov.my/publication/artificial-intelligence-roadmap-2021-2025/> (accessed  
960 December 22, 2024).
- 961 108. Malaysia launches national AI office for policy, regulation. Available at:  
962 [https://www.reuters.com/technology/artificial-intelligence/malaysia-launches-national-ai-office-policy-](https://www.reuters.com/technology/artificial-intelligence/malaysia-launches-national-ai-office-policy-regulation-2024-12-12/)  
963 [regulation-2024-12-12/](https://www.reuters.com/technology/artificial-intelligence/malaysia-launches-national-ai-office-policy-regulation-2024-12-12/) (accessed December 23, 2024).
- 964 109. The National Guidelines on AI Governance and Ethics. Available at:  
965 <https://mastic.mosti.gov.my/publication/the-national-guidelines-on-ai-governance-ethics/> (accessed  
966 December 26, 2024).
- 967 110. An act establishing a regulatory framework for a robust, reliable, and trustworthy development,  
968 application, and use of artificial intelligence (AI) systems, creating the Philippine Council on Artificial  
969 Intelligence, delineating the roles of various government agencies, defining and penalizing certain  
970 prohibited acts. Available at: [https://docs.congress.hrep.online/legisdocs/basic\\_19/HB07913.pdf](https://docs.congress.hrep.online/legisdocs/basic_19/HB07913.pdf)  
971 (accessed December 26, 2024).
- 972 111. Brunei, Draft Guide on Artificial Intelligence (AI) Governance and Ethics for Brunei Darussalam.  
973 Available at: [https://www.aiti.gov.bn/media/eysd0thx/draft-guide-on-ai-governance-ethics-for-public-](https://www.aiti.gov.bn/media/eysd0thx/draft-guide-on-ai-governance-ethics-for-public-consultation_9july2024.pdf)  
974 [consultation\\_9july2024.pdf](https://www.aiti.gov.bn/media/eysd0thx/draft-guide-on-ai-governance-ethics-for-public-consultation_9july2024.pdf) (accessed December 26, 2024).
- 975 112. Decree of the President of the Russian Federation on the Development of Artificial Intelligence in the  
976 Russian Federation. Available at: [https://cset.georgetown.edu/wp-content/uploads/Decree-of-the-](https://cset.georgetown.edu/wp-content/uploads/Decree-of-the-President-of-the-Russian-Federation-on-the-Development-of-Artificial-Intelligence-in-the-Russian-Federation-.pdf)  
977 [President-of-the-Russian-Federation-on-the-Development-of-Artificial-Intelligence-in-the-Russian-](https://cset.georgetown.edu/wp-content/uploads/Decree-of-the-President-of-the-Russian-Federation-on-the-Development-of-Artificial-Intelligence-in-the-Russian-Federation-.pdf)  
978 [Federation-.pdf](https://cset.georgetown.edu/wp-content/uploads/Decree-of-the-President-of-the-Russian-Federation-on-the-Development-of-Artificial-Intelligence-in-the-Russian-Federation-.pdf) (accessed December 3, 2024).
- 979 113. Federal Law of the Russian Federation No. 123-FZ. Available at: [https://cis-](https://cis-legislation.com/document.fwx?rgn=124089)  
980 [legislation.com/document.fwx?rgn=124089](https://cis-legislation.com/document.fwx?rgn=124089) (accessed December 3, 2024).
- 981 114. The concept of regulating artificial intelligence has been updated. Available at:  
982 <https://www.pnp.ru/social/koncepciyu-regulirovaniya-iskusstvennogo-intellekta-obnovili.html>  
983 (accessed December 3, 2024).
- 984 115. Order of the Ministry of Health of Russian Federation dated 30 August 2021 No. 885n “On Approval of  
985 the Procedure for a Conformity Assessment of Medical Devices in the Form of Technical Tests,  
986 Toxicological Studies, and Clinical Trials for the Purpose of the Marketing Authorization of Medical  
987 Devices”. Available at: <https://beawire.com/order-of-the-ministry-of-health-of-russian-federation->

- 988 [dated-30-august-2021-no-885n-on-approval-of-the-procedure-for-a-conformity-assessment-of-medical-](#)  
989 [devices-in-the-form-of-technical-tests-toxico/](#) (accessed December 3, 2024).
- 990 116.Federal Law of the Russian Federation of July 31, 2020 No. 258-FZ. Available at: [https://cis-](https://cis-legislation.com/document.fwx?rgn=126433)  
991 [legislation.com/document.fwx?rgn=126433](https://cis-legislation.com/document.fwx?rgn=126433) (accessed December 3, 2024).
- 992 117.On approval of the Concept of Digital Transformation, Development of the Information and  
993 Communication Technology Industry and Cybersecurity for 2023 - 2029. Available at:  
994 <https://adilet.zan.kz/rus/docs/P2300000269#z13> (accessed December 21, 2024).
- 995 118.On approval of the Concept for the Development of Artificial Intelligence for 2024-2029. Available at:  
996 <https://adilet.zan.kz/rus/docs/P2400000592#z187> (accessed December 21, 2024).
- 997 119.AI Strategies in Central Asia, South Caucasus & Mongolia. Available at:  
998 [https://areterapa.com/insight\\_20241210](https://areterapa.com/insight_20241210) (accessed December 21, 2024).
- 999 120.On approval of the Strategy for the Development of Artificial Intelligence Technologies until 2030.  
1000 Available at: <https://lex.uz/ru/pdfs/7158606#> (accessed December 21, 2024).
- 1001 121.Strategy for the development of artificial intelligence in the Republic of Tajikistan for the period up to  
1002 2040. Available at: [http://www.portali-](http://www.portali-huquqi.tj/publicadliya/view_qonunhoview.php?showdetail=&asosi_id=26592&language=ru)  
1003 [huquqi.tj/publicadliya/view\\_qonunhoview.php?showdetail=&asosi\\_id=26592&language=ru](http://www.portali-huquqi.tj/publicadliya/view_qonunhoview.php?showdetail=&asosi_id=26592&language=ru) (accessed  
1004 December 16, 2024).
- 1005 122.Concept of Digital Transformation of the Kyrgyz Republic for 2024-2028. Available at:  
1006 <https://cbd.minjust.gov.kg/30-164/edition/6414/ru> (accessed December 16, 2024).
- 1007 123.Parliamentarians approved a draft model law regulating the use of artificial intelligence. Available at:  
1008 [https://iacis.ru/novosti/postoyannye\\_komissii/parlamentarii\\_odobrili\\_proekt\\_modelnogo\\_zakona\\_reguliruyushego\\_printeipi\\_ispolzovaniya\\_iskusstvennogo\\_intellekta](https://iacis.ru/novosti/postoyannye_komissii/parlamentarii_odobrili_proekt_modelnogo_zakona_reguliruyushogo_printeipi_ispolzovaniya_iskusstvennogo_intellekta) (accessed December 16, 2024).
- 1009  
1010 124.Garabagh Declaration was adopted at Informal Summit of the Heads of State of the Organization of  
1011 Turkic States in Shusha. Available at: <https://president.az/en/articles/view/66416> (accessed December  
1012 16, 2024).
- 1013 125.Azerbaijan has developed a draft strategy for the development of AI - Minister. Available at:  
1014 <https://bm.ge/ru/news/v-azerbaidzane-razrabotan-proekt-strategii-po-razvitiu-ii-ministr> (accessed  
1015 December 16, 2024).

- 1016 126.Armenia is working on a Scientific and Technological Development Strategy: artificial intelligence in  
1017 focus. Available at: [https://bm.ge/ru/news/armeniia-rabotaet-nad-strategiei-naucno-texnologiceskogo-](https://bm.ge/ru/news/armeniia-rabotaet-nad-strategiei-naucno-texnologiceskogo-razvitiia-v-fokuse-iskusstvennyi-intellekt)  
1018 [razvitiia-v-fokuse-iskusstvennyi-intellekt](https://bm.ge/ru/news/armeniia-rabotaet-nad-strategiei-naucno-texnologiceskogo-razvitiia-v-fokuse-iskusstvennyi-intellekt) (accessed December 14, 2024).
- 1019 127.2024-2028 Activity Program of the Government of Mongolia. Available at:  
1020 <https://legalinfo.mn/mn/detail?lawId=17141368388631&showType=1> (accessed December 14, 2024).
- 1021 128.New law to regulate use of AI approved in Bahrain. Available at:  
1022 [https://www.zawya.com/en/world/middle-east/new-law-to-regulate-use-of-ai-approved-in-bahrain-](https://www.zawya.com/en/world/middle-east/new-law-to-regulate-use-of-ai-approved-in-bahrain-djpvmm4r)  
1023 [djpvmm4r](https://www.zawya.com/en/world/middle-east/new-law-to-regulate-use-of-ai-approved-in-bahrain-djpvmm4r) (accessed December 14, 2024).
- 1024 129.AI Watch: Global regulatory tracker - United Arab Emirates. Available at:  
1025 <https://www.whitecase.com/insight-our-thinking/ai-watch-global-regulatory-tracker-uae> (accessed  
1026 December 14, 2024).
- 1027 130.UAE National Strategy for Artificial-Intelligence 2031. Available at: [https://ai.gov.ae/wp-](https://ai.gov.ae/wp-content/uploads/2021/07/UAE-National-Strategy-for-Artificial-Intelligence-2031.pdf)  
1028 [content/uploads/2021/07/UAE-National-Strategy-for-Artificial-Intelligence-2031.pdf](https://ai.gov.ae/wp-content/uploads/2021/07/UAE-National-Strategy-for-Artificial-Intelligence-2031.pdf) (accessed  
1029 December 14, 2024).
- 1030 131.The UAE Charter for the Development and Use of Artificial Intelligence. Available at:  
1031 [https://uaelegislation.gov.ae/en/policy/details/the-uae-charter-for-the-development-and-use-of-](https://uaelegislation.gov.ae/en/policy/details/the-uae-charter-for-the-development-and-use-of-artificial-intelligence)  
1032 [artificial-intelligence](https://uaelegislation.gov.ae/en/policy/details/the-uae-charter-for-the-development-and-use-of-artificial-intelligence) (accessed December 14, 2024).
- 1033 132.DIFC Enacts Amended Data Protection Regulations. Available at: [https://www.difc.ae/Whats-](https://www.difc.ae/Whats-on/News/difc-enacts-amended-data-protection-regulations)  
1034 [on/News/difc-enacts-amended-data-protection-regulations](https://www.difc.ae/Whats-on/News/difc-enacts-amended-data-protection-regulations) (accessed December 12, 2024).
- 1035 133.AI Ethics Principles. Available at: <https://sdaia.gov.sa/en/SDAIA/about/Documents/ai-principles.pdf>  
1036 (accessed December 25, 2024).
- 1037 134.MDS – G010 Guidance on Artificial Intelligence (AI) and Machine Learning (ML) technologies based  
1038 Medical Devices. Available at: <https://www.sfda.gov.sa/sites/default/files/2023-01/MDS-G010ML.pdf>  
1039 (accessed December 3, 2024).
- 1040 135.AI Adoption Framework. Available at:  
1041 <https://sdaia.gov.sa/en/SDAIA/about/Files/AIAdoptionFramework.pdf> (accessed December 3, 2024).
- 1042 136.Saudi Vision 2030. Available at: <https://www.vision2030.gov.sa/en> (accessed December 3, 2024).
- 1043 137.Qatar National Vision 2030. Available at: [https://www.gco.gov.qa/en/state-of-qatar/qatar-national-](https://www.gco.gov.qa/en/state-of-qatar/qatar-national-vision-2030/our-story/)  
1044 [vision-2030/our-story/](https://www.gco.gov.qa/en/state-of-qatar/qatar-national-vision-2030/our-story/) (accessed December 3, 2024).

- 1045 138.National Artificial Intelligence Strategy for Qatar. Available at:  
1046 [https://www.mcit.gov.qa/sites/default/files/national\\_artificial\\_intelligence\\_strategy\\_for\\_qatar\\_0.pdf](https://www.mcit.gov.qa/sites/default/files/national_artificial_intelligence_strategy_for_qatar_0.pdf)  
1047 (accessed December 3, 2024).
- 1048 139.Guidelines for Secure Usage and Adoption of Artificial Intelligence. Available at:  
1049 [https://assurance.ncsa.gov.qa/sites/default/files/publications/policy/2024/CSSP\\_Guidelines\\_for\\_Secure](https://assurance.ncsa.gov.qa/sites/default/files/publications/policy/2024/CSSP_Guidelines_for_Secure)  
1050 [\\_Usage\\_and\\_Adoption\\_of\\_Artificial\\_intelligence-Eng-v1.0\\_1\\_0.pdf](https://assurance.ncsa.gov.qa/sites/default/files/publications/policy/2024/CSSP_Guidelines_for_Secure_Usage_and_Adoption_of_Artificial_intelligence-Eng-v1.0_1_0.pdf) (accessed December 7, 2024).
- 1051 140.National Artificial Intelligence Strategy 2021-2025. Available at:  
1052 [https://wp.oecd.ai/app/uploads/2021/12/Turkey\\_National\\_Artificial\\_Intelligence\\_Strategy\\_2021-](https://wp.oecd.ai/app/uploads/2021/12/Turkey_National_Artificial_Intelligence_Strategy_2021-)  
1053 [2025.pdf](https://wp.oecd.ai/app/uploads/2021/12/Turkey_National_Artificial_Intelligence_Strategy_2021-2025.pdf) (accessed December 7, 2024).
- 1054 141.Draft law on artificial intelligence. Available at:  
1055 <https://www.tbmm.gov.tr/Yasama/KanunTeklifi/e21539a0-888a-4500-81be-01904a918c53> (accessed  
1056 December 16, 2024).
- 1057 142.The First Artificial Intelligence Law Proposal in Türkiye Has Been Submitted to the Grand National  
1058 Assembly. Available at: [https://cakmak.av.tr/wp-content/uploads/2024/07/The-First-Artificial-](https://cakmak.av.tr/wp-content/uploads/2024/07/The-First-Artificial-Intelligence-Law-Proposal-in-Turkiye-Has-Been-Submitted-to-the-Grand-National-Assembly.pdf)  
1059 [Intelligence-Law-Proposal-in-Turkiye-Has-Been-Submitted-to-the-Grand-National-Assembly.pdf](https://cakmak.av.tr/wp-content/uploads/2024/07/The-First-Artificial-Intelligence-Law-Proposal-in-Turkiye-Has-Been-Submitted-to-the-Grand-National-Assembly.pdf)  
1060 (accessed December 7, 2024).
- 1061 143.For the first time in Israel: The principles of the policy for the responsible development of the field of  
1062 artificial intelligence were published for public comment. Available at:  
1063 <https://www.gov.il/en/pages/most-news20221117> (accessed December 7, 2024).
- 1064 144.Jordan presents its AI Strategy and Implementation Roadmap. Available at:  
1065 <https://www.unido.org/news/jordan-presents-its-ai-strategy-and-implementation-roadmap> (accessed  
1066 December 8, 2024).
- 1067 145.National Artificial Intelligence Strategy in Lebanese Industry (2020-2050). Available at:  
1068 <http://www.industry.gov.lb/PublicationsAndStudies?lang=en-us> (accessed December 7, 2024).
- 1069 146.National Artificial Intelligence Policy. Available at: [https://blog.decree.om/wp-](https://blog.decree.om/wp-content/uploads/2024/08/national_ai_policy_english.docx)  
1070 [content/uploads/2024/08/national\\_ai\\_policy\\_english.docx](https://blog.decree.om/wp-content/uploads/2024/08/national_ai_policy_english.docx) (accessed December 8, 2024).
- 1071 147.Kuwait National AI Strategy 2025-2028. Available at:  
1072 [https://cait.gov.kw/media/filer\\_public/3f/b4/3fb49a45-4a78-4489-8898-](https://cait.gov.kw/media/filer_public/3f/b4/3fb49a45-4a78-4489-8898-b68e2bd260ca/kuwait_national_strategy.pdf)  
1073 [b68e2bd260ca/kuwait\\_national\\_strategy.pdf](https://cait.gov.kw/media/filer_public/3f/b4/3fb49a45-4a78-4489-8898-b68e2bd260ca/kuwait_national_strategy.pdf) (accessed December 8, 2024).

- 1074 148.National Code of Ethics for Artificial Intelligence. Available at: <https://www.ai.gov.ps/en> (accessed  
1075 December 8, 2024).
- 1076 149.L’Algérie adopte une stratégie nationale de l’Intelligence Artificielle. Available at:  
1077 <https://acp.cd/diplomatie/lalgerie-adopte-une-strategie-nationale-de-lintelligence-artificielle/> (accessed  
1078 December 8, 2024).
- 1079 150.Morocco Launches Digital 2030 Strategy to Transform Economy and Society. Available at:  
1080 <https://meatechwatch.com/2024/10/03/morocco-launches-digital-2030-strategy-to-transform-economy->  
1081 [and-society/](https://meatechwatch.com/2024/10/03/morocco-launches-digital-2030-strategy-to-transform-economy-) (accessed December 8, 2024).
- 1082 151.Zambia launches artificial intelligence strategy to boost digital economy. Available at:  
1083 <https://www.zambiamonitor.com/zambia-launches-artificial-intelligence-strategy-to-boost-digital->  
1084 [economy/](https://www.zambiamonitor.com/zambia-launches-artificial-intelligence-strategy-to-boost-digital-) (accessed December 8, 2024).
- 1085 152.Senegal advances in AI: Launch of Afrik’IA and National Artificial Intelligence Strategy. Available at:  
1086 <https://www.senenews.com/en/senegal/senegal-advances-in-ai-launch-of-afrikia-and-national-artificial->  
1087 [intelligence-strategy-1401.html](https://www.senenews.com/en/senegal/senegal-advances-in-ai-launch-of-afrikia-and-national-artificial-) (accessed December 8, 2024).
- 1088 153.National Artificial Intelligence Strategy. Available at: <https://ncair.nitda.gov.ng/wp->  
1089 [content/uploads/2024/08/National-AI-Strategy\\_01082024-copy.pdf](https://ncair.nitda.gov.ng/wp-content/uploads/2024/08/National-AI-Strategy_01082024-copy.pdf) (accessed December 16, 2024).
- 1090 154.South Africa National Artificial Intelligence Policy Framework. Available at: <https://fwblaw.co.za/wp->  
1091 [content/uploads/2024/10/South-Africa-National-AI-Policy-Framework-1.pdf](https://fwblaw.co.za/wp-content/uploads/2024/10/South-Africa-National-AI-Policy-Framework-1.pdf) (accessed December 14,  
1092 2024).
- 1093 155.Council Approves Ethiopia’s First Artificial Intelligence Policy. Available at:  
1094 <https://ethiopianmonitor.com/2024/06/28/council-approves-ethiopias-first-artificial-intelligence-policy/>  
1095 (accessed December 16, 2024).
- 1096 156.Communications and Informatics Authority announces the launch of the National Policy for Artificial  
1097 Intelligence. Available at: <https://lana.gov.ly/post.php?id=307543&lang=en> (accessed December 16,  
1098 2024).
- 1099 157.National Artificial Intelligence and Big Data Strategy. Available at:  
1100 <https://numerique.gouv.bj/assets/documents/national-artificial-intelligence-and-big-data-strategy->  
1101 [1682673348.pdf](https://numerique.gouv.bj/assets/documents/national-artificial-intelligence-and-big-data-strategy-) (accessed December 16, 2024).



- 1102 158. Republic of Ghana National Artificial Intelligence Strategy: 2023-2033. Available at:  
1103 [https://www.slideshare.net/slideshow/ghana-s-national-artificial-intelligence-strategy-2023-2033-](https://www.slideshare.net/slideshow/ghana-s-national-artificial-intelligence-strategy-2023-2033-pdf/270928634)  
1104 [pdf/270928634](https://www.slideshare.net/slideshow/ghana-s-national-artificial-intelligence-strategy-2023-2033-pdf/270928634) (accessed December 16, 2024).
- 1105 159. The National AI Policy. Available at:  
1106 [https://www.minict.gov.rw/index.php?eID=dumpFile&t=f&f=67550&token=6195a53203e197efa4759](https://www.minict.gov.rw/index.php?eID=dumpFile&t=f&f=67550&token=6195a53203e197efa47592f40ff4aaf24579640e)  
1107 [2f40ff4aaf24579640e](https://www.minict.gov.rw/index.php?eID=dumpFile&t=f&f=67550&token=6195a53203e197efa47592f40ff4aaf24579640e) (accessed December 16, 2024).
- 1108 160. Egypt National Artificial Intelligence Strategy. Available at:  
1109 [https://mcit.gov.eg/Upcont/Documents/Publications\\_672021000\\_Egypt-National-AI-Strategy-](https://mcit.gov.eg/Upcont/Documents/Publications_672021000_Egypt-National-AI-Strategy-English.pdf)  
1110 [English.pdf](https://mcit.gov.eg/Upcont/Documents/Publications_672021000_Egypt-National-AI-Strategy-English.pdf) (accessed December 16, 2024)
- 1111 161. National AI Strategy: Unlocking Tunisia's capabilities potential. Available at:  
1112 <https://www.anpr.tn/national-ai-strategy-unlocking-tunisia-s-capabilities-potential/11/> (accessed  
1113 December 16, 2024)
- 1114 162. Mauritius Artificial Intelligence Strategy. Available at:  
1115 <https://mitci.govmu.org/Documents/Strategies/Mauritius%20AI%20Strategy.pdf> (accessed December  
1116 16, 2024).
- 1117 163. Kenya's Path to AI: Launch of Kenya's National AI Strategy Development Process. Available at:  
1118 [https://www.kictanet.or.ke/kenyas-path-to-ai-launch-of-kenyas-national-ai-strategy-development-](https://www.kictanet.or.ke/kenyas-path-to-ai-launch-of-kenyas-national-ai-strategy-development-process/)  
1119 [process/](https://www.kictanet.or.ke/kenyas-path-to-ai-launch-of-kenyas-national-ai-strategy-development-process/) (accessed December 15, 2024).
- 1120 164. The Kenya Robotics and Artificial Intelligence Society Bill, 2023. Available at:  
1121 <https://kenyaai.ke/docs/kenya-robotics-and-artificial-intelligence-society-bill-2023/> (accessed  
1122 December 16, 2024).
- 1123 165. Tanzania highlights its ambitious plans for AI. Available at:  
1124 [https://www.thecitizen.co.tz/tanzania/news/national/tanzania-highlights-its-ambitious-plans-for-ai-](https://www.thecitizen.co.tz/tanzania/news/national/tanzania-highlights-its-ambitious-plans-for-ai-4519516)  
1125 [4519516](https://www.thecitizen.co.tz/tanzania/news/national/tanzania-highlights-its-ambitious-plans-for-ai-4519516) (accessed December 14, 2024).
- 1126 166. The Digital Transformation Strategy for Africa (2020-2030). Available at:  
1127 <https://au.int/sites/default/files/documents/38507-doc-dts-english.pdf> (accessed December 24, 2024).
- 1128 167. AU Data Policy Framework. Available at: [https://au.int/sites/default/files/documents/42078-doc-AU-](https://au.int/sites/default/files/documents/42078-doc-AU-DATA-POLICY-FRAMEWORK-ENG1.pdf)  
1129 [DATA-POLICY-FRAMEWORK-ENG1.pdf](https://au.int/sites/default/files/documents/42078-doc-AU-DATA-POLICY-FRAMEWORK-ENG1.pdf) (accessed December 27, 2024).
- 1130 168. Agenda 2063. Available at: [https://au.int/sites/default/files/documents/36204-doc-](https://au.int/sites/default/files/documents/36204-doc-agenda2063_popular_version_en.pdf)  
1131 [agenda2063\\_popular\\_version\\_en.pdf](https://au.int/sites/default/files/documents/36204-doc-agenda2063_popular_version_en.pdf) (accessed December 27, 2024).

- 1132 169.Therapeutic Goods Act 1989. Available at:
- 1133 <https://www.legislation.gov.au/C2004A03952/latest/versions> (accessed November 4th, 2024).
- 1134 170.Privacy Act 1989. Available at: <https://www.legislation.gov.au/C2004A03712/2019-08-13/text>
- 1135 (accessed December 27, 2024).
- 1136 171.Medical devices reforms: software regulation. Available at: <https://www.tga.gov.au/how-we-regulate/supply-therapeutic-good/supply-medical-device/medical-devices-reforms/medical-devices-reforms-software-regulation>
- 1137
- 1138 (accessed December 27, 2024).
- 1139 172.Therapeutic Products Act 2023. Available at:
- 1140 <https://www.legislation.govt.nz/act/public/2023/0037/latest/DLM7312612.html> (accessed December
- 1141 27, 2024).
- 1142 173.Privacy Act 2020. Available at:
- 1143 <https://www.legislation.govt.nz/act/public/2020/0031/latest/LMS23223.html> (accessed December 27,
- 1144 2024).
- 1145 174.Safe and Responsible Artificial Intelligence in Health Care – Legislation and Regulation Review.
- 1146 Available at: <https://www.pc.gov.au/research/supporting/ai-in-healthcare/ai-in-healthcare.pdf> (accessed
- 1147 December 28, 2024).
- 1148 175.Consultation: Clarifying and strengthening the regulation of Artificial Intelligence (AI). Available at:
- 1149 [https://www.tga.gov.au/resources/consultation/consultation-clarifying-and-strengthening-regulation-](https://www.tga.gov.au/resources/consultation/consultation-clarifying-and-strengthening-regulation-artificial-intelligence-ai)
- 1150 [artificial-intelligence-ai](https://www.tga.gov.au/resources/consultation/consultation-clarifying-and-strengthening-regulation-artificial-intelligence-ai) (accessed December 28, 2024).
- 1151 176.Approach to work on Artificial Intelligence. Available at:
- 1152 [https://www.mbie.govt.nz/dmsdocument/28913-approach-to-work-on-artificial-intelligence-](https://www.mbie.govt.nz/dmsdocument/28913-approach-to-work-on-artificial-intelligence-proactiverelease-pdf)
- 1153 [proactiverelease-pdf](https://www.mbie.govt.nz/dmsdocument/28913-approach-to-work-on-artificial-intelligence-proactiverelease-pdf) (accessed December 28, 2024).
- 1154 177.Figure 1, Interactive Version. Available at: <https://datawrapper.dwcdn.net/D0L5s/1/> (accessed
- 1155 December 29, 2024).
- 1156 178.Global South Countries (Group of 77 and China). Available at: [http://www.fc-](http://www.fc-ssc.org/en/partnership_program/south_south_countries)
- 1157 [ssc.org/en/partnership\\_program/south\\_south\\_countries](http://www.fc-ssc.org/en/partnership_program/south_south_countries) (accessed December 29, 2024).
- 1158 179.Europe’s rushed attempt to set the rules for AI. Available at: [https://www.ft.com/content/6cc7847a-2fc5-](https://www.ft.com/content/6cc7847a-2fc5-4df0-b113-a435d6426c81)
- 1159 [4df0-b113-a435d6426c81](https://www.ft.com/content/6cc7847a-2fc5-4df0-b113-a435d6426c81) (accessed December 29, 2024).
- 1160 180.Letter: Legislation on AI evokes memories of GDPR hassle. Available at:
- 1161 <https://www.ft.com/content/0439f459-dab6-4d53-85e8-134684829e37> (accessed December 29, 2024).

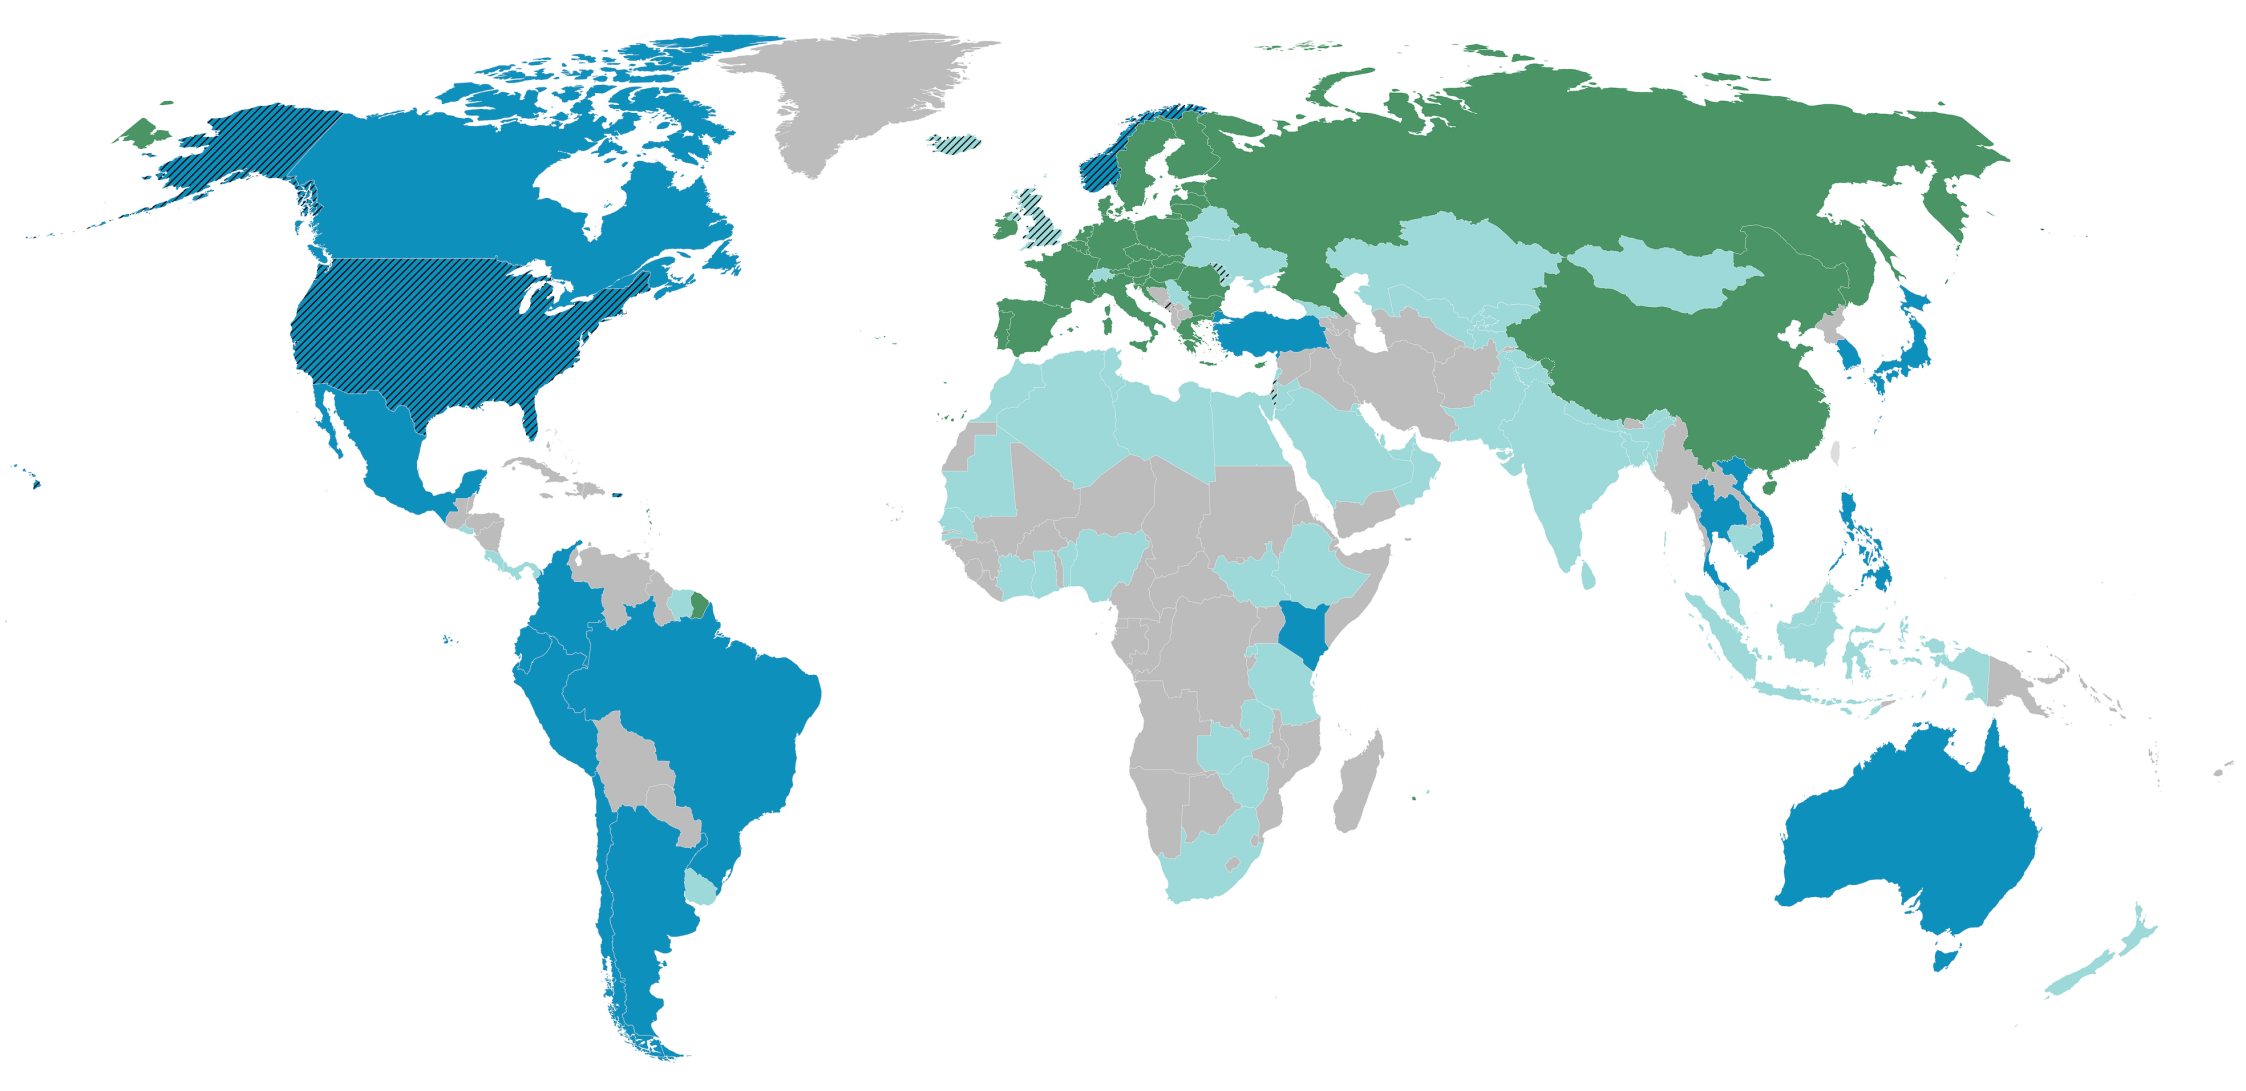

Source: https://medrxiv.org/content/medrxiv/early/2025/01/25/2025.01.25.25321061.full.pdf
